# Supplementary material for: Normal reference values for aerobic fitness in cystic fibrosis: a scoping review
Source: HighWire-hosted journal article supplement (doi:10.1136/bmjsem-2022-001490), 2022-12-01
Supplement: bmjsem-2022-001490supp001_data_supplement.pdf [file bmjsem-2022-001490supp001_data_supplement.pdf]

**Supplemental File 1.** List of studies included in analyses.

| Study                       | Sample  | Age (Mean ± SD)<br>Age Range         | Modality  | Equation Used          | Notes                                                                                                                                                                                                                                                                                                                                             |
|-----------------------------|---------|--------------------------------------|-----------|------------------------|---------------------------------------------------------------------------------------------------------------------------------------------------------------------------------------------------------------------------------------------------------------------------------------------------------------------------------------------------|
| Hjeltnes et al., 1984 [1]   | 8M/0F   | 16.2 (?)<br>15.5-17.0                | Cycle     | Astrand & Rodahl, 1977 | As exact equation is not known, suitability for sex, age and modality cannot be established.                                                                                                                                                                                                                                                      |
| Edlund et al., 1986 [2]     | 14M/9F  | ?<br>7.0-14.0                        | Treadmill | ACSM, 1980             | As exact equation is not known, suitability for sex, age and modality cannot be established.                                                                                                                                                                                                                                                      |
| Marcotte et al., 1986a [3]  | 15M/7F  | ?<br>16.0-38.0                       | Cycle     | Jones & Campbell, 1982 | References provides options for children 8 and above, and adults 20 and above. Not clear how old an individual paediatric data is applicable to and therefore how 18-19 year olds are accounted for. Therefore, only a partial match for age-appropriate risk of bias.                                                                            |
| Marcotte et al.,1986b [4]   | 40M/10F | 20 (6)<br>11.0-38.0                  | Cycle     | Jones & Campbell, 1982 | References provides options for children 8 and above, and adults 20 and above. Not clear how old an individual paediatric data is applicable to and therefore how 18-19 year olds are accounted for. Therefore, only a partial match for age-appropriate risk of bias.                                                                            |
| Stanghelle et al., 1986 [5] | 5M/5F   | 11.5 (?)<br>11-12                    | Cycle     | Hermansen, 1973        |                                                                                                                                                                                                                                                                                                                                                   |
| Versteegh et al., 1986 [6]  | 12M/12F | 16 (?)<br>10-22                      | Cycle     | Unknown                | Equation not stated in manuscript.                                                                                                                                                                                                                                                                                                                |
| Browning et al., 1990 [7]   | 7M/4F   | 21 (1)*<br>17-29<br><br>*SE, not SD  | Cycle     | Jones & Campbell, 1982 | References provides options for children 8 and above, and adults 20 and above. Not clear how old an individual paediatric data is applicable to and therefore how 18-19 year olds are accounted for (also assuming 17 year olds are treated as children). Therefore, only a partial match for age-appropriate risk of bias.                       |
| Versteegh et al., 1990 [8]  | 12M/12F | 16 (?)<br>10-22                      | Cycle     | Unknown                | Equation not stated in manuscript.                                                                                                                                                                                                                                                                                                                |
| Heijerman et al., 1991 [9]  | 8M/8F   | 28.7 (5.0)<br>21-40                  | Cycle     | Jones et al., 1985     |                                                                                                                                                                                                                                                                                                                                                   |
| Regnis et al., 1991 [10]    | 12M/10F | 23 (1)*<br>18-33<br><br>*SEM, not SD | Cycle     | Unknown                | States Jones et al., 1985 (Am Rev Resp Dis, 131:700-708), is used for W <sub>max</sub> , but not VO <sub>2max</sub> . Whilst it may be assumed this reference would also be for VO <sub>2max</sub> , it is not explicitly stated and is therefore listed as 'unknown'.                                                                            |
| Heijerman et al., 1992 [11] | 6M/4F   | 28.3 (5.7)<br>21-40                  | Cycle     | Jones et al., 1985     |                                                                                                                                                                                                                                                                                                                                                   |
| Nixon et al., 1992 [12]     | 57M/51F | 17 (?)<br>7-35                       | Cycle     | Orenstein, in press    | <p>This is assumed to be the same reference as Orenstein (1993) as this is stated as ‘in press’ when the manuscript was published in 1992 and thus timelines would be appropriate.</p> <p>However, as this is an assumption and the reference cannot be verified, the agreement with regards to age, sex, and modality cannot be established.</p> |

| Study                        | Sample           | Age (Mean ± SD)<br>Age Range                                                    | Modality                           | Equation Used          | Notes                                                                                                                                                                                                                                                                                                                                                                                                                                                                                                                                                                                                                                                                                                                                                                                                                             |
|------------------------------|------------------|---------------------------------------------------------------------------------|------------------------------------|------------------------|-----------------------------------------------------------------------------------------------------------------------------------------------------------------------------------------------------------------------------------------------------------------------------------------------------------------------------------------------------------------------------------------------------------------------------------------------------------------------------------------------------------------------------------------------------------------------------------------------------------------------------------------------------------------------------------------------------------------------------------------------------------------------------------------------------------------------------------|
| Williams et al., 1992 [13]   | 1 (sex unknown)* | 37.3 (6.7)*<br>?<br><br>Wider sample of all DLTx patients. Age of pwCF unknown. | Cycle                              | Jones, 1988            | *Wider sample of n = 7 of various diseases (all undergoing DLTx).<br><br>Paper states: " <i>Reference values were derived from Jones and Campbell (9) and Cotes (10)</i> ".<br><br>Cotes is a lung function reference, so authors have assumed exercise data is from Jones, even though it is not explicitly stated which variable was obtained from which reference.<br><br>Exact equation used from Jones & Campbell (1988) is not known, but sex-specific equations are available. Age and modality of source equation not known from reference.                                                                                                                                                                                                                                                                               |
| Freeman et al., 1993 [14]    | 15M/7F           | 22.1 (5.1)<br>15-35                                                             | Cycle                              | Jones, 1988            | Reference explicitly refers to pages 306-307 of Jones (1988), which is appendix with tables of equations.                                                                                                                                                                                                                                                                                                                                                                                                                                                                                                                                                                                                                                                                                                                         |
| Henke et al., 1993 [15]      | 19M/14F          | 23 (7)<br>12-39                                                                 | Cycle                              | Unknown                | Equation not stated in manuscript.                                                                                                                                                                                                                                                                                                                                                                                                                                                                                                                                                                                                                                                                                                                                                                                                |
| Kaplan et al., 1996 [16]     | 20M/15F          | dF508/dF508:*<br>16.0 (7.3)<br>?<br><br>dF508/-:<br>17.0 (8.7)<br>?             | Cycle                              | Orenstein, 1993        | Age data split into two groups based upon dF508 status.<br><br>The manuscript states " <i>This result was also normalised to predicted <math>VO_{2max}</math> according to the formula of Orenstein (27)</i> ".<br><br>However, reference #27 is Pate (1990, Endurance Exercise Trainability). Orenstein is actually reference #26.<br><br>Despite discrepancy in referencing, as Orenstein is explicitly stated, this reference is carried forward for analysis. Although issues with Orenstein, 1993 mean that age and modality are unknown for risk of bias.                                                                                                                                                                                                                                                                   |
| Alison et al., 1997 [17]     | 18M/6F           | 26 (7.7)<br>17-44                                                               | Cycle                              | Jones et al., 1985     | Only control group had data presented as % <sub>pred</sub> .                                                                                                                                                                                                                                                                                                                                                                                                                                                                                                                                                                                                                                                                                                                                                                      |
| Evans et al., 1997 [18]      | 0M/1F*           | 39 (x)<br>(n/a)<br><br>Wider sample:<br>49.7 (2.4)<br>39-57                     | Quadriceps exercise in MRI machine | Wasserman et al., 1987 | *Wider sample of n = 9 (4M/5F), all LTx recipients.<br><br>Authors acknowledge use of cycle ergometry reference data as a study limitation, stating: " <i>Because there are no predicted <math>VO_{2max}</math> values for quadriceps exercise, the data were expressed as a percentage of predicted cycling <math>VO_{2max}</math> to decrease the confounding effects of age, sex, and height</i> ".<br><br>As several equations are available in Wasserman et al., 1987, it is unclear which is used and therefore age is given 'unknown' for risk of bias, but sex is appropriate as separate equations are given for males and females. Modality is acknowledged as being derived from cycle ergometry in the study, and can therefore be given a 'not appropriate' for risk of bias (despite authors acknowledgment above). |
| Moorcroft et al., 1997a [19] | 52M/35F          | 19.8 (x)<br>15-40                                                               | Cycle                              | Jones, 1988            |                                                                                                                                                                                                                                                                                                                                                                                                                                                                                                                                                                                                                                                                                                                                                                                                                                   |
| Moorcroft et al., 1997b [20] | 19M/11F          | 19.8 (1.1)*<br>16-40                                                            | Cycle                              | Jones, 1988            | *Age data presented as Mean (SEM), not mean (SD).<br><br>Data for n = 30, of a wider n = 92. The n = 30 represents a 're-tested' cohort of patients amongst wider pool. This is the only sub-group that sex data is available for.                                                                                                                                                                                                                                                                                                                                                                                                                                                                                                                                                                                                |

| Study                          | Sample            | Age (Mean ± SD)<br>Age Range                                                              | Modality  | Equation Used          | Notes                                                                                                                                                                                                                                                                                                                                                                                                                                                                                                                                                                                                                                                                                                                                                                                       |
|--------------------------------|-------------------|-------------------------------------------------------------------------------------------|-----------|------------------------|---------------------------------------------------------------------------------------------------------------------------------------------------------------------------------------------------------------------------------------------------------------------------------------------------------------------------------------------------------------------------------------------------------------------------------------------------------------------------------------------------------------------------------------------------------------------------------------------------------------------------------------------------------------------------------------------------------------------------------------------------------------------------------------------|
| Oelberg et al., 1988 [21]      | 7M/3F             | 26.9 (2.5)<br>18-41                                                                       | Cycle     | Hansen et al., 1984    | DLTx cohort.<br><br>Hansen et al., (1984) reference group is in men aged from 34-74 years, so only a partial match for sex and age for risk of bias.                                                                                                                                                                                                                                                                                                                                                                                                                                                                                                                                                                                                                                        |
| Pellegrino et al., 1998 [22]   | 4 (sex unknown)*  | ? (?)<br>?<br><br>Whole sample:<br>37 (11)<br>?                                           | Cycle     | Unknown                | *Wider sample of n = 8 (5M/3F) patients, all are post-DLTx.<br><br>Equation not stated in manuscript.                                                                                                                                                                                                                                                                                                                                                                                                                                                                                                                                                                                                                                                                                       |
| Tuzin et al., 1998 [23]        | 2M/1F*            | 11.3 (2.3)<br>10-14<br><br>Wider sample: *<br>9.4 (2.3)<br>7-14                           | Cycle     | Unknown                | *Wider sample of n = 10 (8M/2F).<br><br>This manuscript reports three separate sets of studies, whereby only one incorporated fitness testing to obtain VO <sub>2max</sub> (n = 3, 2M/1F).<br><br>Equation not stated in manuscript.                                                                                                                                                                                                                                                                                                                                                                                                                                                                                                                                                        |
| Boas et al., 1999 [24]         | 25M/0F            | 11.6 (2.8)<br>7-18*                                                                       | Cycle     | Orenstein, 1991        | *Age range for whole study sample, including patients with asthma, and control group.<br><br>Orenstein (1993) states in preface: " <i>This book is a compilation of presentations made at the Standards for Pediatric Exercise Testing Workshop in October 1991 in Scottsdale, AZ</i> ".<br><br>Therefore, as a 1991 book cannot be identified, it is assumed that the 1991and 1993 reference are the same (particularly as reference page numbers match), and thus the same issues associated with Orenstein (1993) are applicable.                                                                                                                                                                                                                                                        |
| Bradley et al., 1999 [25]      | 14M/6F            | 25 (7)<br>?                                                                               | Treadmill | Unknown                | Equation not stated in manuscript.                                                                                                                                                                                                                                                                                                                                                                                                                                                                                                                                                                                                                                                                                                                                                          |
| McKone et al., 1999 [26]       | 6M/3F             | 26.3 (8.3)<br>?                                                                           | Cycle     | Jones, 1988            | Explicitly states equation used:<br><br>VO <sub>2max</sub> = 0.83 height <sup>2.73</sup> x (1 – 0.007 age) x (1 – 0.25 Sex)                                                                                                                                                                                                                                                                                                                                                                                                                                                                                                                                                                                                                                                                 |
| Schwaiblmair et al., 1999 [27] | 19* (sex unknown) | SLTx:<br>49.3 (10.6)<br>?<br><br>DLTx:<br>30.7(9.9)<br>?<br><br>HLTx:<br>28.7 (10.1)<br>? | Cycle     | Wasserman et al., 1994 | *Wider sample of n = 103 pts, all recipients of LTx or HLTx. The stated sample of n = 19 for pwCF is a minimum. 23% of 78 LTx patients have CF, equalling n = 18. 4% of 25 HLTx patients have CF, equalling n = 1. There are additional patients with congenital CF within a sample of 14% of 'miscellaneous' LTx patients, but exact number is not known.<br><br>Reference states pages 1-97 of Wasserman et al., (1994). However, page 97 finishes in middle of chapter on 'protocols for exercise testing', with no reference to any normative equations. In other textbooks from Wasserman, the chapter on 'normal values' covers normative equations.<br><br>As it is unclear where (and which) the reference equation is from, all sections are unknown with regards to risk of bias. |

| Study                          | Sample              | Age (Mean ± SD)<br>Age Range                         | Modality            | Equation Used                       | Notes                                                                                                                                                                                                                                                                                                                                                                                                                                                                                                                                                                                                                                                                    |
|--------------------------------|---------------------|------------------------------------------------------|---------------------|-------------------------------------|--------------------------------------------------------------------------------------------------------------------------------------------------------------------------------------------------------------------------------------------------------------------------------------------------------------------------------------------------------------------------------------------------------------------------------------------------------------------------------------------------------------------------------------------------------------------------------------------------------------------------------------------------------------------------|
| Boas et al., 2000a [28]        | 7M/8F               | 13.4 (?)<br>8-21                                     | Cycle               | Orenstein, 1991                     | <p>Orenstein (1993) states in preface: "<i>This book is a compilation of presentations made at the Standards for Pediatric Exercise Testing Workshop in October 1991 in Scottsdale, AZ</i>".</p> <p>Therefore, as a 1991 book cannot be identified, it is assumed that the 1991and 1993 reference are the same (particularly as reference page numbers match), and thus the same issues associated with Orenstein (1993) are applicable.</p>                                                                                                                                                                                                                             |
| Boas et al., 2000b [29]        | 6M/6F               | 12.0 (?)<br>8-17                                     | Cycle               | Orenstein, 1991                     | <p>This manuscript doesn't state the equation used in the methodology but does in results section.</p> <p>Orenstein (1993) states in preface: "<i>This book is a compilation of presentations made at the Standards for Pediatric Exercise Testing Workshop in October 1991 in Scottsdale, AZ</i>".</p> <p>Therefore, as a 1991 book cannot be identified, it is assumed that the 1991and 1993 reference are the same (particularly as reference page numbers match), and thus the same issues associated with Orenstein (1993) are applicable.</p>                                                                                                                      |
| Fink et al., 2000 [30]         | 1M/0F               | 28 (x)<br>(n/a)                                      | Unknown             | Unknown                             | Equation not stated in manuscript.                                                                                                                                                                                                                                                                                                                                                                                                                                                                                                                                                                                                                                       |
| Moser et al., 2000 [31]        | 8M/14F              | 10.3 (0.7)<br>6-18                                   | Cycle               | Own Reference Data<br>(unpublished) | <p>Reference equation not provided.</p> <p>The exact statement from the manuscript reads: "<i>Exercise data from 54 healthy children (37 females and 17 males) who had been recently tested under the supervision of one of the authors (D.M.C.) were used to establish normal values for gas exchange responses to exercise</i>".</p> <p>Therefore, as both sexes were included in this reference data, it can be assumed that sex-appropriate data is used for risk of bias purposes. Age can be assumed for risk of bias as it is stated to be derived from children, but the exact age range is not known. Modality data is not known for risk of bias purposes.</p> |
| Frangolias & Wilcox, 2001 [32] | 32M/38F             | 27.3 (8.7)<br>17-53                                  | Cycle               | Jones, 1988                         | <p>Explicitly states equation used:<br/><math>VO_{2max} = 3.20 \text{ height} - 0.024 \text{ age} + 0.019 \text{ weight} - 0.49 \text{ sex} - 3.17</math></p> <p>Manuscript explicitly states page 306 of Jones (1988), which directs to Appendix D with aforementioned equation.</p>                                                                                                                                                                                                                                                                                                                                                                                    |
| Karila et al., 2001 [33]       | 6 (sex<br>unknown)* | ? (?)<br>?<br><br>Wider sample:<br>12 (3.04)<br>5-17 | Cycle/Tread<br>mill | Wasserman et al.,<br>1994           | <p>*Wider sample of n = 92 (56M/36F) consisted of multiple conditions, including asthma, spasmodic cough, congenital heart disease, bronchopulmonary dysplasia, and interstitial lung disease, amongst others.</p> <p>Choice of modality was stature dependent, with a minimum stature of 125 cm for cycle ergometry. Total cycle n = 55, treadmill n = 37.</p> <p>Purpose of study was to assess feasibility of implementing individualised workloads, hence difference in modalities.</p>                                                                                                                                                                              |
| Pouliou et al., 2001 [34]      | 9M/9F               | 24 (13)<br>14-61                                     | Cycle               | Unknown                             | Equation not stated in manuscript.                                                                                                                                                                                                                                                                                                                                                                                                                                                                                                                                                                                                                                       |
| Blau et al., 2002 [35]         | 6M/7F               | 16 (4)<br>9-25                                       | Cycle               | Unknown                             | Cites Wasserman et al., (1987) for exercise protocol, but gives no further details on reference equations used for outcome measures.                                                                                                                                                                                                                                                                                                                                                                                                                                                                                                                                     |

| Study                         | Sample  | Age (Mean ± SD)<br>Age Range                                                                             | Modality | Equation Used                          | Notes                                                                                                                                                                                                                                                                                                                                                                                                                                                                                                                                                                        |
|-------------------------------|---------|----------------------------------------------------------------------------------------------------------|----------|----------------------------------------|------------------------------------------------------------------------------------------------------------------------------------------------------------------------------------------------------------------------------------------------------------------------------------------------------------------------------------------------------------------------------------------------------------------------------------------------------------------------------------------------------------------------------------------------------------------------------|
| Hutler et al., 2002 [36]      | 7M/3F   | 12.1 (1.7)<br>9.7-14.3                                                                                   | Cycle    | 1. Rowland, 1996<br>2. Orenstein, 1993 | 1. Rowland reference used for sex & age predicted values.<br>2. Orenstein reference used for sex & height predicted values.<br><br>Use of two different equation produces different % <sub>pred</sub> values within this study, and therefore this ends up with one significant result, and one non-significant result, after an intervention (Table 5, Hutler 2002).                                                                                                                                                                                                        |
| McKone et al., 2002 [37]      | 7M/1F   | 26 (1)<br>?                                                                                              | Cycle    | Wasserman et al., 1999                 | Explicitly states equation used:<br>$VO_{2max} = 0.83 \text{ height}^{2.73} \times (1 - 0.007 \text{ age}) \times (1 - 0.25 \text{ Sex})$<br><br>This is the equation from Jones (1988) and would follow with the group of McKone et al., using this in other work within this review. However, the citation is for #28 (Wasserman et al., 1999), and Jones is #27.<br><br>It is assumed that this is likely a mistake in citations, but all items are given 'unknown' status for purposes of risk of bias, apart from sex, as this is explicitly built into equation given. |
| Thin et al., 2002 [38]        | 23M/7F* | Mild CF:<br>24.3 (6.0)<br>?<br><br>Moderate CF:<br>23.2 (5.5)<br>?<br><br>Severe CF:<br>25.3 (3.2)<br>?  | Cycle    | Wasserman et al., 1994                 | *n = 36 originally recruited, but only n = 30 analysed due to exclusions (e.g., non-identification of gas exchange threshold).<br><br>Cited chapter is on 'Normal Values'.                                                                                                                                                                                                                                                                                                                                                                                                   |
| Frangolias et al., 2003a [39] | 44M/24F | Normal:<br>27.0 (1.6)<br>?<br><br>Osteopenic:<br>30.6 (1.1)<br>?<br><br>Osteoporotic:<br>37.5 (4.0)<br>? | Cycle    | Jones, 1988                            | Sample split into 3 groups based upon bone mineral density z-score.<br><br>Cites Frangolias & Wilcox (2001), which used Jones (1988).                                                                                                                                                                                                                                                                                                                                                                                                                                        |
| Frangolias et al., 2003b [40] | 46M/27F | 29.6 (1.0)<br>?                                                                                          | Cycle    | Jones, 1988                            | Cites Frangolias & Wilcox (2001), which used Jones (1988).                                                                                                                                                                                                                                                                                                                                                                                                                                                                                                                   |

| Study                     | Sample           | Age (Mean ± SD)<br>Age Range                                                             | Modality          | Equation Used          | Notes                                                                                                                                                                                                                                                                                                                                                                                                                                                                                |
|---------------------------|------------------|------------------------------------------------------------------------------------------|-------------------|------------------------|--------------------------------------------------------------------------------------------------------------------------------------------------------------------------------------------------------------------------------------------------------------------------------------------------------------------------------------------------------------------------------------------------------------------------------------------------------------------------------------|
| Klijn et al., 2003a [41]  | 65 (sex unknown) | 10.5 (2.9)<br>4-18                                                                       | Cycle & Treadmill | Binkhorst et al., 1986 | <12 years = Treadmill<br>≥ 12 years = Cycle ergometry<br><br>Manuscript acknowledges modality difference, stating: “ <i>VO<sub>2peak</sub> as a percentage of predicted (VO<sub>2peak</sub>%) values were obtained from an age- and gender-matched Dutch reference population, which used the same modes of exercise</i> ”.<br><br>Source data is conducted in 6-18 year olds, whereas the citing study is in 4-18 year olds, so age is only partially appropriate for risk of bias. |
| Klijn et al., 2003b [42]  | 39 (sex unknown) | 13.2 (1.8)<br>9-17                                                                       | Cycle             | Binkhorst et al., 1992 | Source data is conducted in 12-14 and 16-18 year olds, whereas the citing study is in 9-17 year olds, so age is only partially appropriate for risk of bias.                                                                                                                                                                                                                                                                                                                         |
| Sexauer et al., 2003 [43] | 24M/16F          | VL:<br>29 (1.3)<br>19-42<br><br>NVL:<br>29 (1.2)<br>19-39                                | Cycle             | Jones, 1988            | 2 groups based upon presence of ventilatory limitation (VL) or no ventilatory limitation (NVL).                                                                                                                                                                                                                                                                                                                                                                                      |
| Klijn et al., 2004 [44]   | 20 (sex unknown) | Training:<br>13.6 (1.3)<br><br>Control:<br>14.2 (2.1)<br><br>*Whole Group Range:<br>9-18 | Cycle             | Binkhorst et al., 1986 | Cohort split into two groups – training and control. Mean (± SD) age given for both groups, but age range only given for entire cohort.<br><br>Source data for cycle ergometry is conducted in 12-18 year olds, whereas the citing study is in 9-18 year olds, so age is only partially appropriate for risk of bias                                                                                                                                                                 |
| Moorcroft et al., [45]    | 48 (sex unknown) | Training:<br>23.5 (6.4)<br>?<br><br>Control:<br>23.6 (5.5)<br>?                          | Cycle & Arm       | Jones, 1988            | Participants underwent both maximal cycle ergometry and arm ergometry exercise tests. Despite VO <sub>2peak</sub> (% <sub>pred</sub> ) being stated in methodology, no results are presented.<br><br>Modality can only be listed as ‘partial’ due to lack of data for arm ergometry, as Jones (1988) is assumed to be cycle ergometry.                                                                                                                                               |
| Pinet et al., 2004 [46]   | 8M/4F            | 33.8<br>(8.6)                                                                            | Cycle             | Hansen et al., 1984    | Source data from Hansen et al., (1984) is conducted in males only, and in 34-74 year olds. Therefore, both sex and age can only be given a ‘partial’ match for risk of bias.                                                                                                                                                                                                                                                                                                         |
| Dodd et al., 2005 [47]    | 7M/1F            | 24 (7)<br>?                                                                              | Cycle             | Jones, 1988            | Explicitly states equation used: VO <sub>2max</sub> = 0.83 height <sup>2.73</sup> x (1 – 0.007 age) x (1 – 0.25 Sex)<br><br>Page range for Jones (1988) cited in reference list includes the appendices.                                                                                                                                                                                                                                                                             |

| Study                        | Sample                                                | Age (Mean ± SD)<br>Age Range                                   | Modality | Equation Used          | Notes                                                                                                                                                                                                                                                                                                                                                                                                                                                                                                                                                                                                                                                       |
|------------------------------|-------------------------------------------------------|----------------------------------------------------------------|----------|------------------------|-------------------------------------------------------------------------------------------------------------------------------------------------------------------------------------------------------------------------------------------------------------------------------------------------------------------------------------------------------------------------------------------------------------------------------------------------------------------------------------------------------------------------------------------------------------------------------------------------------------------------------------------------------------|
| Fournier et al., 2005 [48]   | 7M/8F                                                 | 30.1 (12.5)<br>?                                               | Cycle    | Unknown                | Equation not stated in manuscript.                                                                                                                                                                                                                                                                                                                                                                                                                                                                                                                                                                                                                          |
| Hebestreit et al., 2005 [49] | 11M/7F                                                | 15.8 (6.1)<br>9.8-33.8                                         | Cycle    | Orenstein, 1993        |                                                                                                                                                                                                                                                                                                                                                                                                                                                                                                                                                                                                                                                             |
| McKone et al., [50]          | 15*<br><br>Study 1:<br>6M/3F<br><br>Study 2:<br>7M/2F | Study 1:<br>26.7 (3.1)<br>?<br><br>Study 2:<br>23.7 (1.5)<br>? | Cycle    | Jones, 1988            | *Two studies were run in one paper, with overlap of participants between studies, so an exact breakdown of sex cannot be determined.<br><br>Explicitly states equation used: $VO_{2max} = 0.83 \text{ height}^{2.73} \times (1 - 0.007 \text{ age}) \times (1 - 0.25 \text{ Sex})$                                                                                                                                                                                                                                                                                                                                                                          |
| Moorcroft et al., 2005 [51]  | 63M/41F                                               | 24.6 (7.1)<br>16-49                                            | Cycle    | Jones, 1988            |                                                                                                                                                                                                                                                                                                                                                                                                                                                                                                                                                                                                                                                             |
| Dodd et al., 2006a [52]      | 3M/4F                                                 | 23 (4.1)<br>19-30                                              | Cycle    | Jones, 1988            | Explicitly states equation used: $VO_{2max} = 0.83 \text{ height}^{2.73} \times (1 - 0.007 \text{ age}) \times (1 - 0.25 \text{ Sex})$                                                                                                                                                                                                                                                                                                                                                                                                                                                                                                                      |
| Dodd et al., 2006b [53]      | 13M/9F                                                | 22 (5.9)<br>17-41                                              | Cycle    | Jones, 1988            | Explicitly states equation used: $VO_{2max} = 0.83 \text{ height}^{2.73} \times (1 - 0.007 \text{ age}) \times (1 - 0.25 \text{ Sex})$                                                                                                                                                                                                                                                                                                                                                                                                                                                                                                                      |
| Hebestreit et al., 2006 [54] | 35M/36F                                               | 20.5 (6.0)<br>12.2-40.0                                        | Cycle    | Orenstein, 1993        |                                                                                                                                                                                                                                                                                                                                                                                                                                                                                                                                                                                                                                                             |
| Reinsma et al., 2006 [55]    | 2M/3F*                                                | 31.4 (8.8)**<br>17-38**                                        | Cycle    | Wasserman et al., 2001 | *Wider sample of LTx pts = 17M/8F.<br>**Age data for pwCF only. Wider sample = 43 (10), 17-56.<br><br>All pwCF are DLTx recipients.<br><br>This study cites Wasserman et al., (2001), yet it appears that a 2001 version of this textbook does not exist. The 3 <sup>rd</sup> edition (1999) and 4 <sup>th</sup> edition (2004) are referenced by other studies in this analysis, yet this is the only to mention a copy from 2001. An edition is not provided by the authors in their reference list, and so the exact copy cannot be identified. As the reference cannot be explicitly identified, everything is given 'unknown' status for risk of bias. |
| Barry & Gallagher, 2007 [56] | 7M/8F                                                 | 25.5 (8.6)<br>?                                                | Cycle    | Jones, 1988            | Description of experimental procedures refers to McKone et al., (1999), who utilised Jones (1988). However, no further referencing is made for outcomes measures (i.e., $VO_{2max}$ ).                                                                                                                                                                                                                                                                                                                                                                                                                                                                      |
| Barry et al., 2008 [57]      | 15M/0F                                                | 23.9 (?)<br>19-40                                              | Cycle    | Jones, 1988            | Explicitly states equation used: $VO_{2max} = 0.83 \text{ height}^{2.73} \times (1 - 0.007 \text{ age})$<br><br>No sex offset included, as only male participants involved.                                                                                                                                                                                                                                                                                                                                                                                                                                                                                 |



| Study                       | Sample            | Age (Mean ± SD)<br>Age Range                                                                   | Modality | Equation Used                | Notes                                                                                                                                                                                                                                                                                                                                                                                                 |
|-----------------------------|-------------------|------------------------------------------------------------------------------------------------|----------|------------------------------|-------------------------------------------------------------------------------------------------------------------------------------------------------------------------------------------------------------------------------------------------------------------------------------------------------------------------------------------------------------------------------------------------------|
| Dodd et al., 2008 [58]      | 25 (sex unknown)* | 25.5 (?)<br>17-52                                                                              | Cycle    | Jones, 1988                  | *Wider sample of n = 169 (94M/75F), age 27.3 (10.4), 16-52 years, with a sub-sample of n = 25 chosen at random to also undergo CPET for study.<br><br>Explicitly states equation used: $VO_{2max} = 0.83 \text{ height}^{2.73} \times (1 - 0.007 \text{ age}) \times (1 - 0.25 \text{ Sex})$<br><br>Page range for Jones (1988) cited in reference list includes the appendices.                      |
| Hubert et al., 2009 [59]    | 23M/11F           | 19 (?)<br>15-25                                                                                | Cycle    | Wasserman et al., 2005       | Cited chapter is on 'Normal Values', although unclear which is used.                                                                                                                                                                                                                                                                                                                                  |
| Ruf & Hebestreit, 2009 [60] | 39M/36F           | Female:<br>19.8 (6.9)<br>?<br><br>Male:<br>21.8 (6.9)<br>?<br><br>*Whole Group Range:<br>12-41 | Cycle    | Orenstein, 1993              |                                                                                                                                                                                                                                                                                                                                                                                                       |
| Troosters et al., 2009 [61] | 35M/29F           | Female:<br>27 (9)<br>?<br><br>Male:<br>25 (6)<br>?                                             | Cycle    | Jones, 1988                  |                                                                                                                                                                                                                                                                                                                                                                                                       |
| Zavorsky et al., 2009 [62]  | 3M/9F             | 9.8 (2.0)<br>?                                                                                 | Cycle    | Cooper & Weiler-Ravell, 1984 |                                                                                                                                                                                                                                                                                                                                                                                                       |
| Groen et al., 2010 [63]     | 8M/5F             | 15.8 (1.8)<br>?                                                                                | Cycle    | Binkhorst et al., 1992       | Source data is conducted in 12-14 and 16-18 year olds, whereas the citing study has a mean of 15.8 (±1.8) years, so any 15 years olds will not be accounted for and therefore age is only partially appropriate for risk of bias.<br><br>Study also cites Takken et al., (2007, Int J Sports Med, 28, 580 – 584), which in turn cites Binkhorst et al., 1992. Reason for additional citation unclear. |
| Gruet et al., 2010 [64]     | 25M/6F            | 29.6 (6.0)<br>?                                                                                | Cycle    | Unknown                      | Equation not stated in manuscript.                                                                                                                                                                                                                                                                                                                                                                    |
| McBride et al., 2010 [65]   | 33M/31F           | 9.3 (0.9)<br>?                                                                                 | Cycle    | Cooper et al., 1984          |                                                                                                                                                                                                                                                                                                                                                                                                       |



| Study                      | Sample            | Age (Mean ± SD)<br>Age Range                                                                 | Modality             | Equation Used                                                                                                     | Notes                                                                                                                                                                                                                                                                                                                                                                                                                                                                                                                                                                                                            |
|----------------------------|-------------------|----------------------------------------------------------------------------------------------|----------------------|-------------------------------------------------------------------------------------------------------------------|------------------------------------------------------------------------------------------------------------------------------------------------------------------------------------------------------------------------------------------------------------------------------------------------------------------------------------------------------------------------------------------------------------------------------------------------------------------------------------------------------------------------------------------------------------------------------------------------------------------|
| Nguyen et al., 2010 [66]   | 21M/30F           | 30.2 (?)<br>16-67                                                                            | Cycle                | ATS/ACCP, 2003                                                                                                    | <p>Unclear from paper which equation was used. As issues exist regarding sex-appropriateness of Hansen et al., 1984, a ‘partial’ can only be given for risk of bias.</p> <p>In addition, age can only be ‘unknown’ status as it may be appropriate if Jones et al., (1985) were used, but not if Hansen et al., (1984) were used.</p> <p>Modality can be assumed as both Jones et al., (1985) and Hansen et al., (1984) used cycle ergometry.</p> <p>As ATS/ACCP document itself is the article cited, &lt;5 years is awarded a ‘yes’ (as it is unclear which underlying equation was used to counter this).</p> |
| Bartels et al., 2011 [67]  | 35 (sex unknown)* | ?(?)<br>?<br><br>*Wider sample:<br>51 (14)<br>?                                              | Cycle                | Unknown                                                                                                           | <p>*Wider sample of n= 153 LTx patients (78M/75F), although CF breakdown not known.</p> <p>CF group is a combined CF &amp; Bronchiectasis sample.</p> <p>Equation not stated in manuscript. Study cites ATS/ACCP 2003 for CPET termination criteria, but not reference data.</p>                                                                                                                                                                                                                                                                                                                                 |
| Dwyer et al., 2011 [68]    | 10M/4F            | 27 (7)<br>18-44                                                                              | Cycle &<br>Treadmill | 1: Jones et al., 1985 (Cycle)<br>2: Drinkwater et al., 1975 (Treadmill)<br>3. Froelicher et al., 1974 (Treadmill) | <p>Crossover trial examining effect of different modalities upon sputum expectoration, hence different equations for different modalities.</p> <p>Treadmill data references are sex-specific, hence why two sets of treadmill values given.</p> <p>Data from Froelicher et al., (1974) is in males aged 20-53, so any males aged &lt;20 years will not match equation. As it is not known from manuscript if, and how many, males were &lt;20 years, age can only be given a ‘partial’ match for risk of bias.</p>                                                                                               |
| Gruber et al., 2011 [69]   | 186M/158F         | Female:<br>19.9 (8.1)<br>?<br><br>Male:<br>22.0 (7.5)<br>?<br><br>Whole Group Range:<br>7-43 | Cycle                | Orenstein, 1993                                                                                                   |                                                                                                                                                                                                                                                                                                                                                                                                                                                                                                                                                                                                                  |
| Hulzebos et al., 2011 [70] | 0M/1F             | 16 (x)<br>n/a                                                                                | Cycle                | Unknown                                                                                                           | Equation not stated in manuscript.                                                                                                                                                                                                                                                                                                                                                                                                                                                                                                                                                                               |
| Leroy et al., 2011 [71]    | 4M/14F            | 32 (12.6)<br>20-67                                                                           | Cycle                | ERS, 1997                                                                                                         | <p>Unknown which exact equations used. As ERS cites several studies, including Hansen et al., (1984) [males only, aged 34-74 years] and Blackie et al., (1989) [aged &gt;55 years only], both sex and age can only be given ‘partial’ appropriateness for risk of bias.</p> <p>All studies cited by ERS used cycle ergometry, so this can be awarded an appropriate match for risk of bias.</p>                                                                                                                                                                                                                  |

| Study                           | Sample           | Age (Mean ± SD)<br>Age Range                                     | Modality | Equation Used                                        | Notes                                                                                                                                                                                                                                                                                                                                                                                                                                                                                                                                                                                                                                                                                                                                                                           |
|---------------------------------|------------------|------------------------------------------------------------------|----------|------------------------------------------------------|---------------------------------------------------------------------------------------------------------------------------------------------------------------------------------------------------------------------------------------------------------------------------------------------------------------------------------------------------------------------------------------------------------------------------------------------------------------------------------------------------------------------------------------------------------------------------------------------------------------------------------------------------------------------------------------------------------------------------------------------------------------------------------|
| Tejero Garcia et al., 2011 [72] | 23M/27F          | Female:<br>23.5 (19.5-27)*<br>?<br><br>Male:<br>25 (19-30)*<br>? | Cycle    | Unknown                                              | * Age data presented as median (IQR).<br><br>Equation not stated in manuscript.                                                                                                                                                                                                                                                                                                                                                                                                                                                                                                                                                                                                                                                                                                 |
| Traylor et al., 2011 [73]       | 13M/5F*          | 23 (7)<br>?                                                      | Cycle    | Unknown                                              | *Total n = 18, with Table 2 stating 26% are female. However, 26% of 18 = 4.68, and therefore n = 5 female (and consequently n = 13 male) is assumed.<br><br>Equation not stated in manuscript.                                                                                                                                                                                                                                                                                                                                                                                                                                                                                                                                                                                  |
| Vallier et al., 2011 [74]       | 11M/0F           | 26.8 (6.9)<br>?                                                  | Cycle    | Jones, 1988                                          | Explicitly states equation used: $VO_{2max} = 0.83 \text{ height}^{2.73} \times (1 - 0.007 \text{ age}) \times (1 - 0.25 \text{ Sex})$                                                                                                                                                                                                                                                                                                                                                                                                                                                                                                                                                                                                                                          |
| Vivodtzev et al., 2011 [75]     | 4M/0F*           | 36.5 (10.5)*<br>20-49<br><br>*Wider sample:<br>47 (13)<br>20-70  | Cycle    | Unknown                                              | *Wider population of n = 12 (10M/2F), a mixture of SLTx, DLTx and HLTx recipients. All pwCF were DLTx.<br><br>Equation not stated in manuscript.                                                                                                                                                                                                                                                                                                                                                                                                                                                                                                                                                                                                                                |
| Werkman et al., 2011 [76]       | 69M/50F          | 13.8 (1.7)<br>12-18                                              | Cycle    | 1: Gulmans et al., 1997<br><br>2: Saris et al., 1985 | Unclear which equation is referenced for VO <sub>2</sub> , and which is W <sub>peak</sub> , as the manuscript states: " <i>Reference values for VO<sub>2peak</sub> and W<sub>peak</sub> from healthy children and adolescents were obtained from previously studied Dutch children and adolescents (23,24)</i> ".<br><br>Reference #23 = Gulmans, et al., (1997)<br>Reference #24 = Saris et al., (1985)<br><br>Therefore, this statement would imply that VO <sub>2peak</sub> is from Gulmans et al., but no VO <sub>2</sub> data or any equation is in Gulmans et al., (only W <sub>max</sub> ). In addition, Saris et al., does not appear to have any equations to actually use.<br><br>Therefore, both sets of equations given ‘unknown’ status for risk of bias purposes. |
| Wheatley et al., 2011 [77]      | 12M/5F           | 23 (8)<br>?                                                      | Cycle    | Hansen et al., 1984                                  | Age range of group is assumed to be 15-31 (± 1SD from mean). Therefore, age is not appropriate for risk of bias.<br><br>Sex is only partially appropriate as original data is in males only.                                                                                                                                                                                                                                                                                                                                                                                                                                                                                                                                                                                    |
| Armstrong et al., 2012 [78]     | 46 (sex unknown) | ? (?)<br>?<br><br>*Wider sample:<br>58 (?)<br>38-63              | Cycle    | Jones et al., 1985                                   | *Wider sample of n = 183 (50% female), all LTx recipients. Within sample, n = 46 had CF/bronchiectasis.                                                                                                                                                                                                                                                                                                                                                                                                                                                                                                                                                                                                                                                                         |

| Study                                      | Sample            | Age (Mean ± SD)<br>Age Range                                                                                                                         | Modality  | Equation Used           | Notes                                                                                                                                                                                                                                              |
|--------------------------------------------|-------------------|------------------------------------------------------------------------------------------------------------------------------------------------------|-----------|-------------------------|----------------------------------------------------------------------------------------------------------------------------------------------------------------------------------------------------------------------------------------------------|
| Bongers et al., 2012 [79]                  | 13M/9F            | 15.7 (1.5)<br>11.8-18.7                                                                                                                              | Cycle     | Ten Harkel et al., 2011 | As reference data is for males only, sex can only be given 'partial' for risk of bias purposes.                                                                                                                                                    |
| Manika et al., 2012 [80]                   | 11M/6F            | 23.9 (3.5)<br>?                                                                                                                                      | Cycle     | Unknown                 | Equation not stated in manuscript.                                                                                                                                                                                                                 |
| Nguyen et al., 2012 [81]                   | 10M/2F            | 14.7 (2.3)<br>11.3-17.5                                                                                                                              | Cycle     | Unknown                 | Manuscript states: " <i>Percent predicted of VO2peak was calculated using reference data obtained from our laboratory</i> ". Therefore, as sex, age and modality cannot be identified, all criteria are given 'unknown' for risk of bias purposes. |
| Ruf et al., 2012 [82]                      | 18M/23F           | Female:<br>17.4 (6.4)<br>?<br><br>Male:<br>15.9 (4.5)<br>?<br><br>Whole Group Range:<br>12-42                                                        | Cycle     | Orenstein, 1993         |                                                                                                                                                                                                                                                    |
| van de Weert-van Leeuwen et al., 2012 [83] | 85M/64F           | 13.29 (1.24)<br>12-18                                                                                                                                | Cycle     | Binkhorst et al., 1992  |                                                                                                                                                                                                                                                    |
| Armstrong et al., 2013 [84]                | 27 (sex unknown)* | CF not known.<br><br>Wider sample (survivors):<br>56 (?)<br>?<br><br>Wider sample (non-survivors):<br>59 (?)<br>?<br><br>Whole group range:<br>41-64 | Unknown   | Unknown                 | *Wider sample of n = 135 (82M/53F), all LTx recipients, split into survivors vs. non-survivors (1 year after surgery). 27/135 were pwCF.<br><br>Equation not stated in manuscript.                                                                 |
| Ledger et al., 2013 [85]                   | 4M/12F            | 10.9 (2.93)<br>4-15                                                                                                                                  | Cycle     | Unknown                 | Equation not stated in manuscript.                                                                                                                                                                                                                 |
| Moco et al., 2013 [86]                     | 12M/9F            | 25.5 (6.0)<br>?                                                                                                                                      | Treadmill | Neder et al., 1999      |                                                                                                                                                                                                                                                    |
| Poore et al., 2013 [87]                    | 5M/10F            | 12.6 (3.4)<br>7-18                                                                                                                                   | Cycle     | Unknown                 | Equation not stated in manuscript.                                                                                                                                                                                                                 |

| Study                                      | Sample            | Age (Mean ± SD)<br>Age Range                                   | Modality                   | Equation Used             | Notes                                                                                                                                                                                                                                                                                                                                                                                                        |
|--------------------------------------------|-------------------|----------------------------------------------------------------|----------------------------|---------------------------|--------------------------------------------------------------------------------------------------------------------------------------------------------------------------------------------------------------------------------------------------------------------------------------------------------------------------------------------------------------------------------------------------------------|
| Prevotat et al., 2013 [88]                 | 14M/16F           | 27.1 (8.4)<br>18-49                                            | 10m Shuttle<br>(15 Levels) | Unknown                   | Equation not stated in manuscript.<br><br>Within the study, VO <sub>2max</sub> is predicted from the shuttle test, citing Selvadurai et al., 2003, Ped Pulm, 35, 133-138, who in turn cite Leger et al., 1988, J Sport Sci, 6, 93-101.                                                                                                                                                                       |
| Savi et al., 2013 [89]                     | 15M/5F            | 33 (8)<br>?                                                    | Cycle                      | Unknown                   | Equation not stated in manuscript.                                                                                                                                                                                                                                                                                                                                                                           |
| Sovtic et al., 2013 [90]                   | 18M/19F           | 11.98 (3.04)<br>8-17                                           | Cycle                      | Unknown                   | Equation not stated in manuscript.                                                                                                                                                                                                                                                                                                                                                                           |
| Vivodtzev et al., 2013 [91]                | 9M/5F             | Intervention:*<br>28 (6)<br>?<br><br>Control:*<br>32 (11)<br>? | Cycle                      | Unknown                   | *Participants split into two groups: intervention and control. Age mean (SD) only available for individual groups.<br><br>Equation not stated in manuscript.                                                                                                                                                                                                                                                 |
| Barry & Horsley, 2014 [92]                 | 1M/0F             | 20 (x)<br>n/a                                                  | Cycle                      | Unknown                   | Equation not stated in manuscript.                                                                                                                                                                                                                                                                                                                                                                           |
| Brun et al., 2014 [93]                     | 1M/0F             | 19 (x)<br>n/a                                                  | Cycle                      | Unknown                   | Equation not stated in manuscript.                                                                                                                                                                                                                                                                                                                                                                           |
| Cohen & Orenstein, 2014 [94]               | 15M/9F            | 12.8 (?)<br>8-19                                               | Treadmill                  | Unknown                   | Equation not stated in manuscript.                                                                                                                                                                                                                                                                                                                                                                           |
| Hebestreit et al., 2014 [95]               | 39M/37F           | 20.6 (5.8)<br>?                                                | Cycle                      | Orenstein, 1993           |                                                                                                                                                                                                                                                                                                                                                                                                              |
| Hulzebos et al., 2014 [96]                 | 70M/57F           | 12.7 (0.9)<br>11-14                                            | Cycle                      | Ten Harkel & Takken, 2011 | All categories are technically appropriate for risk of bias, but equation for females is limited to a singular value and therefore confidence in results is unclear.                                                                                                                                                                                                                                         |
| Pastre et al., 2014 [97]                   | 53M/49F           | 28 (11)<br>17-67                                               | Cycle                      | Hansen et al., 1984       |                                                                                                                                                                                                                                                                                                                                                                                                              |
| van de Weert-van Leeuwen et al., 2014 [98] | 13 (sex unknown)  | ? (?)<br>12-18                                                 | Cycle                      | Binkhorst et al., 1992    |                                                                                                                                                                                                                                                                                                                                                                                                              |
| Armstrong et al., 2015 [99]                | 14 (sex unknown)* | *Wider sample:<br>57 (?)<br>40-62                              | Cycle                      | Unknown                   | *Wider sample of n = 54 LTx recipients. A total of n = 14 had CF/Bronchiectasis.                                                                                                                                                                                                                                                                                                                             |
| Bongers et al., 2015 [100]                 | 17M/23F           | 14.7 (1.7)<br>11-18                                            | Cycle                      | Bongers et al., 2012      | Bongers et al., 2012 utilises boys and girls, of appropriate age, using cycle ergometry, and would therefore normally be appropriate for risk of bias. However, no explicit equations are given in this edition of the book (they are provided in Bongers et al., 2014), and therefore as the exact method for deriving %pred for VO2max is unknown, this must be given 'unknown' for risk of bias purposes. |
| Erickson et al., 2015 [101]                | 6M/7F             | 20.2 (11.2)<br>7-42                                            | Cycle                      | Unknown                   | Equation not stated in manuscript.                                                                                                                                                                                                                                                                                                                                                                           |

| Study                                  | Sample           | Age (Mean ± SD)<br>Age Range | Modality | Equation Used        | Notes                                                                                                                                                                                                                                            |
|----------------------------------------|------------------|------------------------------|----------|----------------------|--------------------------------------------------------------------------------------------------------------------------------------------------------------------------------------------------------------------------------------------------|
| Fielding et al., 2015 [102]            | 6M/10F           | 13.1 (3.9)<br>?              | Cycle    | Unknown              | Equation not stated in manuscript.                                                                                                                                                                                                               |
| Quon et al., 2015 [103]                | 12M/7F           | 30 (9)<br>?                  | Cycle    | Jones, 1988          |                                                                                                                                                                                                                                                  |
| Savi et al., 2015 [104]                | 20M/10F          | 33 (9)<br>?                  | Cycle    | Jones et al., 1985   |                                                                                                                                                                                                                                                  |
| Stevens et al., 2015 [105]             | 9M/10F           | 13.4 (3.2)<br>?              | Cycle    | Unknown              | Equation not stated in manuscript.                                                                                                                                                                                                               |
| Van Iterson et al., 2015 [106]         | 13M/5F           | 22 (2)<br>?                  | Cycle    | Hansen et al., 1984  |                                                                                                                                                                                                                                                  |
| Visschers et al., 2015 [107]           | 6M/9F            | 9.59 (3.33)<br>5.0-15.6      | Cycle    | Unknown              | Equation not stated in manuscript.                                                                                                                                                                                                               |
| Wheatley et al., 2015a [108]           | 12M/2F           | 22 (8)<br>?                  | Cycle    | Hansen et al., 1984  |                                                                                                                                                                                                                                                  |
| Wheatley et al., 2015b [109]           | 12M/2F           | 22 (8)<br>?                  | Cycle    | Hansen et al., 1984  | Does not explicitly state Hansen et al., 1983, but does cite the other reference from Wheatley et al., 2015 [above, 2015a], who in turn cite Hansen et al., 1984.                                                                                |
| Avramidou et al., 2016 [110]           | 13 (sex unknown) | 14.09 (5.16)<br>?            | Cycle    | Orenstein, 1993      |                                                                                                                                                                                                                                                  |
| Gruet et al., 2016a [111]              | 12M/3F           | 28 (6)<br>?                  | Cycle    | Jones, 1988          | References Jones, 1988 in supplemental file, but not main text.                                                                                                                                                                                  |
| Gruet et al., 2016b [112]              | 17M/8F           | 30 (9)<br>18-45              | Cycle    | Unknown              | Manuscript states further information is in supplemental file, but file cannot be found on journal web page, so ‘unknown’ status must be given for risk of bias.                                                                                 |
| Hatziagorou et al., 2016 [113]         | 10M/18F          | 14.9 (4.0)<br>?              | Cycle    | Orenstein, 1993      |                                                                                                                                                                                                                                                  |
| Radtke et al., 2016 [114]              | 6M/8F            | 30.4 (6.1)<br>?              | Cycle    | Godfrey et al., 1971 | States that Godfrey et al., 1971 is used, but equations are only present for incremental W <sub>max</sub> , not VO <sub>2max</sub> , so it is not clear how %pred values were obtained and is therefore given ‘unknown’ status for risk of bias. |
| Rodriguez-Miguel ez et al., 2016 [115] | 7M/9F            | 22 (9)<br>13-43              | Cycle    | Unknown              | Equation not stated in manuscript.                                                                                                                                                                                                               |
| Tomlinson et al., 2016 [116]           | 0M/1F            | 11 (x)<br>n/a                | Cycle    | Bongers et al., 2014 |                                                                                                                                                                                                                                                  |
| Vallier et al., 2016 [117]             | 17M/3F           | 32.6 (8.3)<br>?              | Cycle    | Unknown              | Equation not stated in manuscript.                                                                                                                                                                                                               |
| Van Iterson et al., 2016a [118]        | 12M/4F           | 23 (4)<br>?                  | Cycle    | Hansen et al., 1984  |                                                                                                                                                                                                                                                  |
| Van Iterson et al., 2016b [119]        | 13M/4F           | 23 (2)<br>?                  | Cycle    | Unknown              | Equation not stated in manuscript.                                                                                                                                                                                                               |

| Study                             | Sample          | Age (Mean ± SD)<br>Age Range                    | Modality  | Equation Used                                   | Notes                                                                                                                                                                                                                                                                                                                                                                                                                                     |
|-----------------------------------|-----------------|-------------------------------------------------|-----------|-------------------------------------------------|-------------------------------------------------------------------------------------------------------------------------------------------------------------------------------------------------------------------------------------------------------------------------------------------------------------------------------------------------------------------------------------------------------------------------------------------|
| Decorte et al., 2017 [120]        | 12M/3F          | 28.1 (6.2)<br>?                                 | Cycle     | Jones, 1988                                     | Paper does not cite Jones (1988) explicitly, but cites Gruet et al., (2016, J Cyst Fib, 15, e1-e8) as this is the same data. Gruet et al., 2016, in turn cites Jones (1988).                                                                                                                                                                                                                                                              |
| Dwyer et al., 2017 [121]          | 15M/9F          | 30 (8)<br>19-48                                 | Treadmill | Unknown                                         | Equation not stated in manuscript.                                                                                                                                                                                                                                                                                                                                                                                                        |
| Edvardsen et al., 2017 [122]      | 21M/11F*        | 34.2 (11.81)<br>?                               | Treadmill | Unknown                                         | *Only n = 14 underwent CPET.<br><br>Equation not stated in manuscript.                                                                                                                                                                                                                                                                                                                                                                    |
| Layton et al., 2017 [123]         | 7 (sex unknown) | ?(?)<br>?<br><br>*Wider sample:<br>57 (11)<br>? | Cycle     | Unknown                                         | *Wider sample of n= 68 (33M/35F), all LTx recipients.<br><br>Equation not stated in manuscript.                                                                                                                                                                                                                                                                                                                                           |
| Radtke et al., 2017 [124]         | 6M/8F           | 29 (25.5-36.0)*                                 | Cycle     | 1.Godfrey et al., 1971<br><br>2.Orenstein, 1993 | *Age data given as median (IQR).<br><br>Manuscript states: “ <i>Data for VO<sub>2peak</sub> and Watt<sub>max</sub> are presented as % predicted values [22,23]</i> ”.<br><br>Ref #22 = Godfrey et al., 1971<br>Ref #23 = Orenstein, 1993<br><br>Therefore, it could be assumed that VO <sub>2peak</sub> is solely from Godfrey et al., (1971), but this is not completely clear, so both references are carried forward for risk of bias. |
| Tucker et al., 2017 [125]         | 17M/16F         | 19 (9)<br>9-43                                  | Cycle     | Unknown                                         | Manuscript references ECFS Exercise Working Group Statement (Hebestreit et al., 2015, Respiration, 90, 332-351), although does not explicitly state which equation is used.                                                                                                                                                                                                                                                               |
| Vandekerckhove et al., 2017 [126] | 24M/23F         | 12.3 (2.4)<br>7-17                              | Cycle     | Wasserman et al., 2012                          |                                                                                                                                                                                                                                                                                                                                                                                                                                           |
| Weir et al., 2017 [127]           | 17M/21F         | 11.0 (2.39)<br>7.3-15.7                         | Cycle     | Cooper et al., 1984                             | Study cites Cooper et al., (1984, Pediatr Res, 18, 845-851).<br><br>However, this study only provides equations for O <sub>2</sub> pulse and therefor given ‘unknown’ status for risk of bias purposes.                                                                                                                                                                                                                                   |
| Avramidou et al., 2018 [128]      | 45M/52F         | 14.9 (4.6)<br>?                                 | Cycle     | Orenstein, 1993                                 |                                                                                                                                                                                                                                                                                                                                                                                                                                           |

| Study                      | Sample           | Age (Mean ± SD)<br>Age Range                                                                          | Modality | Equation Used                                                      | Notes                                                                                                                                                                                                                                                                                                                                   |
|----------------------------|------------------|-------------------------------------------------------------------------------------------------------|----------|--------------------------------------------------------------------|-----------------------------------------------------------------------------------------------------------------------------------------------------------------------------------------------------------------------------------------------------------------------------------------------------------------------------------------|
| Causer et al., 2018 [129]  | 30M/15F          | Adults:<br>31.3 (12.1)<br>?<br><br>Children:<br>12.9 (2.6)<br>?<br><br>Whole Group Range:<br>9.2-62.9 | Cycle    | Orenstein, 1993                                                    |                                                                                                                                                                                                                                                                                                                                         |
| Chelabi et al., 2018 [130] | 12 (sex unknown) | Normal LCI:<br>13.5 (2.6)<br>?<br><br>Elevated LCI:<br>14.0 (1.8)<br>?                                | Cycle    | Jones et al., 1985                                                 | Participants split into two groups based upon Lung Clearance Index (LCI).<br><br>Cites Soumange et al., 2016, Thorax, 71, 804-811, who in turn cites Jones et al., 1985.<br><br>Population in Jones et al., 1985, starts at 15 years of age, so only some participants will be age-appropriate in this study for risk of bias purposes. |
| Chen et al., 2018 [131]    | 10 (sex unknown) | ? (?)<br>8-20                                                                                         | Cycle    | Unknown                                                            | Manuscript states: “Percent predicted peak VO <sub>2</sub> was calculated based on Medgraphics pediatric norms”.                                                                                                                                                                                                                        |
| Foster et al., 2018 [132]  | 39M/44F          | 14.4 (3.2)<br>?                                                                                       | Cycle    | 1. Orenstein, 1993 (<18 years)<br>2.Jones et al., 1985 (≥18 years) | Different equations used dependent upon age.                                                                                                                                                                                                                                                                                            |
| Gruet et al., 2018 [133]   | 23M/12F          | 31 (9)<br>?                                                                                           | Cycle    | Jones et al., 1985                                                 |                                                                                                                                                                                                                                                                                                                                         |
| Puppo et al., 2018 [134]   | 13M/8F           | 8.8 (2.0)<br>?                                                                                        | Cycle    | Cooper & Weiler-Ravell, 1984                                       |                                                                                                                                                                                                                                                                                                                                         |
| Radtke et al., 2018 [135]  | 396M/330F        | 16.4 (13.0-22.1)*                                                                                     | Cycle    | 1.Orenstein, 1993<br>2.Jones et al., 1985                          | *Age data given as median (IQR).<br><br>No indication given for why two different reference equations given.                                                                                                                                                                                                                            |
| Savi et al., 2018 [136]    | 23M/11F          | 33.1 (8.5)<br>?                                                                                       | Cycle    | Jones et al., 1985                                                 |                                                                                                                                                                                                                                                                                                                                         |



| Study                         | Sample    | Age (Mean ± SD)<br>Age Range                                                                          | Modality  | Equation Used                              | Notes                                                                                                                                                                                                                                                                                                                                                                                                                                                                                                                                                                                                       |
|-------------------------------|-----------|-------------------------------------------------------------------------------------------------------|-----------|--------------------------------------------|-------------------------------------------------------------------------------------------------------------------------------------------------------------------------------------------------------------------------------------------------------------------------------------------------------------------------------------------------------------------------------------------------------------------------------------------------------------------------------------------------------------------------------------------------------------------------------------------------------------|
| Stevens, 2018 [137]           | 68M/39F   | SH: *<br>30.8 (9.8)<br>?<br><br>No SH:<br>29.5 (9.3)<br>?                                             | Cycle     | Wasserman et al., 2005                     | *Participants split into two groups, based upon presence of static hyperinflation (SH) (n = 61), or no SH (n = 46).<br><br>Static hyperinflation defined as RV/TLC ≥30%.                                                                                                                                                                                                                                                                                                                                                                                                                                    |
| Stevens & Neyedli, 2018 [138] | 58M/30F   | 30.4 (9.4)<br>18-54                                                                                   | Cycle     | Wasserman et al., 2005                     |                                                                                                                                                                                                                                                                                                                                                                                                                                                                                                                                                                                                             |
| Tomlinson et al., 2018 [139]  | 21M/15F   | 13.4 (2.7)<br>?                                                                                       | Cycle     | Bongers et al., 2014                       |                                                                                                                                                                                                                                                                                                                                                                                                                                                                                                                                                                                                             |
| Tucker et al., 2018 [140]     | 6M/8F     | 14 (3)<br>8-20                                                                                        | Cycle     | Unknown                                    | Equation not stated in manuscript.                                                                                                                                                                                                                                                                                                                                                                                                                                                                                                                                                                          |
| Bar-Yoseph et al., 2019 [141] | 31M/18F   | 19.7 (9.7)<br>?                                                                                       | Cycle     | Unknown                                    | Equation not stated in manuscript.                                                                                                                                                                                                                                                                                                                                                                                                                                                                                                                                                                          |
| Di Paolo et al., 2019 [142]   | 45M/27F   | Group 1:<br>27.5 (24-32.5)<br>?<br><br>Group 2:<br>30 (27-34)<br>?<br><br>Group 3:<br>29 (25-34)<br>? | Cycle     | Unknown                                    | *Age data presented as median (IQR). Participants split into three groups based upon pulmonary function.<br><br>Group 1: ‘Normal’ lung function; FEV <sub>1</sub> /FVC ≥ 0.7, and FEV <sub>1</sub> ≥ 80% predicted value, and FVC ≥ 80% predicted value; n = 14.<br><br>Group 2: ‘Mild Impairment’ in lung function; not satisfying criteria for G1 and FEV <sub>1</sub> ≥ 70% predicted value; n = 23.<br><br>Group 3: ‘Moderate Impairment’ in lung function; not satisfying criteria for G1 and 40% ≤ FEV <sub>1</sub> < 70% predicted value; n = 35.<br><br>Equation not stated in manuscript.          |
| Dwyer et al., 2019 [143]      | 10M/5F    | 27 (9)<br>18-48                                                                                       | Treadmill | Unknown                                    | Equation not stated in manuscript.                                                                                                                                                                                                                                                                                                                                                                                                                                                                                                                                                                          |
| Hebestreit et al., 2019 [144] | 249M/184F | 16.6 (6.1)<br>10.0-44.5                                                                               | Cycle     | 1.Godfrey et al, 1971<br>2.Orenstein, 1993 | Manuscript states: “ <i>Data from lung function testing and CPET were converted to %predicted (11–13)</i> ”.<br><br>Ref #11 = Godfrey et al., 1971.<br>Ref #12 = Orenstein, 1993<br>Ref #13 = Quanjer et al., 2012.<br><br>As this latter reference from Quanjer et al., (2012, Eur Resp J, 40; 1324-1343) is explicitly focused upon spirometry, it can be assumed that it is the equations of Godfrey et al, 1971, and Orenstein, 1993, used for VO <sub>2peak</sub> . However, it is unclear if only one was utilised for VO <sub>2peak</sub> , and therefore both are carried forward for risk of bias. |

| Study                                  | Sample           | Age (Mean ± SD)<br>Age Range                                                                  | Modality | Equation Used | Notes                                                                                                                                                                                                                                                                                                                                                                                                                                                                                                                                                                                                                                                                                                                     |
|----------------------------------------|------------------|-----------------------------------------------------------------------------------------------|----------|---------------|---------------------------------------------------------------------------------------------------------------------------------------------------------------------------------------------------------------------------------------------------------------------------------------------------------------------------------------------------------------------------------------------------------------------------------------------------------------------------------------------------------------------------------------------------------------------------------------------------------------------------------------------------------------------------------------------------------------------------|
| Kampouras et al., 2019a [145]          | 31M/47F          | 14.9 (4.68)<br>?                                                                              | Cycle    | Unknown       | Explicit equations given girls and boys:<br><br>Girls: $VO_{2max} \text{ (L/min)} = 0.0308806 \times \text{Height (cm)} - 2.877$<br>Boys: $VO_{2max} \text{ (L/min)} = 0.044955 \times \text{Height (cm)} - 4.64$<br><br>The manuscript states: " <i>VO2peak% predicted was calculated using the Orenstein gender specific equations [17]</i> ".<br><br>However, upon examination of the reference list, reference #17 is Avramidou et al., (2018, Ped Pulm, 53,1,81-87). Within the list, Orenstein, 1993 is actually reference #16. Therefore, as per McKone et al., 2002, all items (apart from sex, whereby individual equations are provided), all items are 'unknown' for risk of bias.                             |
| Kampouras et al., 2019b [146]          | 77 (sex unknown) | 14.9 (4.7)<br>11-20                                                                           | Cycle    | Unknown       | Explicit equations given girls and boys:<br><br>Girls: $VO_{2max} \text{ (L/min)} = 0.0308806 \times \text{Height (cm)} - 2.877$<br>Boys: $VO_{2max} \text{ (L/min)} = 0.044955 \times \text{Height (cm)} - 4.64$<br><br>The manuscript states: " <i>VO2peak in % predicted (VO2peak%) was calculated with the Orenstein equations (28)</i> ".<br><br>However, upon examination of the reference list, reference #28 is Gustafsson et al., (2003, Ped Pulm, 35; 42-49). Within the list, Orenstein, 1993 is actually reference #31. Therefore, as per McKone et al., 2002, (and Kampouras et al., 2019a) all items (apart from sex, whereby individual equations are provided), all items are 'unknown' for risk of bias. |
| Rodriguez-Miguel ez et al., 2019 [147] | 8M/7F            | 23 (11)<br>?                                                                                  | Cycle    | Unknown       | Equation not stated in manuscript.                                                                                                                                                                                                                                                                                                                                                                                                                                                                                                                                                                                                                                                                                        |
| Ruf et al., 2019 [148]                 | 14M/6F           | 21.7 (8)<br>12-42                                                                             | Cycle    | Unknown       | Equation not stated in manuscript.                                                                                                                                                                                                                                                                                                                                                                                                                                                                                                                                                                                                                                                                                        |
| Savi et al., 2019 [149]                | 3M/0F            | 42 (13)<br>30-60                                                                              | Cycle    | Unknown       | Equation not stated in manuscript.                                                                                                                                                                                                                                                                                                                                                                                                                                                                                                                                                                                                                                                                                        |
| Tucker et al., 2019 [150]              | 10M/10F          | Female:<br>15.1 (6.9)<br>?<br><br>Male:<br>20.4 (11.4)<br>?<br><br>Whole Group Range:<br>8-42 | Cycle    | Unknown       | Equation not stated in manuscript.                                                                                                                                                                                                                                                                                                                                                                                                                                                                                                                                                                                                                                                                                        |
| Boutou et al., 2020 [151]              | 6M/5F            | 27.2 (4.15)<br>?                                                                              | Cycle    | Unknown       | Equation not stated in manuscript.                                                                                                                                                                                                                                                                                                                                                                                                                                                                                                                                                                                                                                                                                        |

| Study                        | Sample  | Age (Mean ± SD)<br>Age Range                                                             | Modality  | Equation Used                                                             | Notes                                                                                                                                                                                                                                                                                                                                                                                                        |
|------------------------------|---------|------------------------------------------------------------------------------------------|-----------|---------------------------------------------------------------------------|--------------------------------------------------------------------------------------------------------------------------------------------------------------------------------------------------------------------------------------------------------------------------------------------------------------------------------------------------------------------------------------------------------------|
| Burghard et al., 2020 [152]  | 4M/3F   | 15.4 (5.8)<br>9-26                                                                       | Cycle     | 1. Bongers et al., 2012 (≤18 years)<br>2. Mylius et al., 2019 (>18 years) | Bongers et al., 2012 utilises boys and girls, of appropriate age, using cycle ergometry, and would therefore normally be appropriate for risk of bias. However, no explicit equations are given in this edition of the book (they are provided in Bongers et al., 2014), and therefore as the exact method for deriving %pred for VO2max is unknown, this must be given 'unknown' for risk of bias purposes. |
| Causer et al., 2020 [153]    | 26M/20F | NGT: *<br>27.5 (7.6)<br>?<br><br>IGT:<br>23.4 (7.6)<br>?<br><br>CFRD:<br>27.8 (6.9)<br>? | Cycle     | Orenstein, 1993                                                           | *Three groups based upon glycaemic status: NGT (normal glucose tolerance); IGT (impaired glucose tolerance); CFRD (cystic fibrosis related diabetes).<br><br>This manuscript does not directly state Orenstein, 1993, but cites previous work by Causer et al., (2018), who in turn cite Orenstein, 1993.                                                                                                    |
| Di Paolo et al., 2020 [154]  | 0M/1F   | 24 (x)<br>n/a                                                                            | Cycle     | Unknown                                                                   | Equation not stated in manuscript.                                                                                                                                                                                                                                                                                                                                                                           |
| Sawyer et al., 2020 [155]    | 8M/6F   | 31 (28-35)*                                                                              | Cycle     | Unknown                                                                   | *Age data given as median (IQR).<br><br>Equation not stated in manuscript.                                                                                                                                                                                                                                                                                                                                   |
| Torvanger et al., 2020 [156] | 69M/47F | Female:<br>32.6 (11.0)<br>18-65<br><br>Male:<br>31.8 (11.0)<br>18-68                     | Treadmill | Edvardsen et al., 2013                                                    | Edvardsen et al., 2013 uses adults from 20+ years, whereas Torvanger uses 18+ years. Therefore, people aged 18-19 years will not be covered by reference equation and therefore is only given a partial match for risk of bias purposes.                                                                                                                                                                     |
| Ulvestad et al., 2020a [157] | 0M/2F*  | ? (?)<br>?<br><br>Wider population range:<br>20-67                                       | Treadmill | Edvardsen et al., 2013                                                    | *Wider population, n = 54 (27M/27F), all LTx recipients.                                                                                                                                                                                                                                                                                                                                                     |

| Study                                                 | Sample            | Age (Mean ± SD)<br>Age Range                                                  | Modality  | Equation Used          | Notes                                                                                                                                                                                                                                                                                                                                                                                                                                                                                                                                                                                                                               |
|-------------------------------------------------------|-------------------|-------------------------------------------------------------------------------|-----------|------------------------|-------------------------------------------------------------------------------------------------------------------------------------------------------------------------------------------------------------------------------------------------------------------------------------------------------------------------------------------------------------------------------------------------------------------------------------------------------------------------------------------------------------------------------------------------------------------------------------------------------------------------------------|
| Ulvestad et al., 2020b [158]                          | 2 (sex unknown)*  | Training Group:<br>52.3 (11.9)<br>?<br><br>Control Group:<br>51.1 (13.5)<br>? | Treadmill | Edvardsen et al., 2013 | *Wider population, n = 54 (27M/27F), all LTx recipients. People with CF assigned to training group.                                                                                                                                                                                                                                                                                                                                                                                                                                                                                                                                 |
| Du Berry et al., 2021 [159]                           | 25M/24F           | 13.8 (?)<br>8.9-18.5                                                          | Cycle     | Wasserman et al., 2005 | Reference provided for Wasserman et al., 2005 explicitly cites page #585. However, this page is the last page of index, and therefore it cannot be ascertained which equation may have been used and all categories are awarded 'unknown' status.                                                                                                                                                                                                                                                                                                                                                                                   |
| Kampouras et al., 2021 [160]                          | 78 (sex unknown)  | 14.9 (4.7)<br>?                                                               | Cycle     | Orenstein, 1993        | Explicitly states equations used:<br><br>Girls: $VO_{2peak} \text{ (l/min)} = 0.0308806 \times \text{Height (cm)} - 2.877$ .<br><br>Boys: $VO_{2peak} \text{ (l/min)} = 0.044955 \times \text{Height (cm)} - 4.64$ .                                                                                                                                                                                                                                                                                                                                                                                                                |
| Rodriguez-Miguel <span>­</span> ez et al., 2021 [161] | 8M/7F             | 23 (11)<br>?                                                                  | Cycle     | Unknown                | Equation not stated in manuscript.<br><br>There is no equation in this manuscript, but it does cite Rodriguez-Miguel <span>­</span> ez et al., 2019, although this paper does not in turn cite an equation.                                                                                                                                                                                                                                                                                                                                                                                                                         |
| Saez-Gimenez et al., 2021 [162]                       | 14 (sex unknown)* | ? (?)<br>?<br><br>Whole sample:<br>48.7 (13.6)<br>?                           | Cycle     | Unknown                | *Whole sample of n = 29, all LTx recipients.<br><br>Equation not stated in manuscript.                                                                                                                                                                                                                                                                                                                                                                                                                                                                                                                                              |
| Sawyer et al., 2021 [163]                             | 8M/6F             | 31 (28-35)*                                                                   | Cycle     | Jones et al., 1985     | *Age data given as median (IQR).                                                                                                                                                                                                                                                                                                                                                                                                                                                                                                                                                                                                    |
| Vendrusculo et al., 2021a [164]                       | 33M/14F           | 15.9 (6.5)<br>?                                                               | Treadmill | Unknown                | Equation not stated in manuscript.                                                                                                                                                                                                                                                                                                                                                                                                                                                                                                                                                                                                  |
| Vendrusculo et al., 2021b [165]                       | 10M/6F            | 19.4 (6.9)<br>?                                                               | Treadmill | Unknown                | Equation not stated in manuscript.                                                                                                                                                                                                                                                                                                                                                                                                                                                                                                                                                                                                  |
| Willmott et al., 2021 [166]                           | 1M/0F             | 25 (x)<br>n/a                                                                 | Cycle     | Orenstein, 1993        | Manuscript doesn't directly state Orenstein, 1993, but cites Causer et al., 2018, who in turn utilise Orenstein, 1993.                                                                                                                                                                                                                                                                                                                                                                                                                                                                                                              |
| Curran et al., 2022 [167]                             | 13M/20F           | 26.2 (7.1)<br>?                                                               | Cycle     | Nixon et al., 2001     | Paper was ePub ahead of print in 2021, but given full record in 2022. Appeared in 2021 search, so included in this review.<br><br>The cited paper of Nixon et al., 2001, does not appear to have an equation for $VO_{2max}$ . The paper states: " <i>Peak oxygen uptake was expressed per kg body mass, and PWC was expressed as % of predicted</i> ", although the cited work of Godfrey et al., 1971, only has equations for %predicted for peak work capacity, but it is not clear where the estimation of $VO_{2max}$ has come from.<br><br>Therefore, age, sex, and modality are all given 'unknown' status for risk of bias. |

| Study                               | Sample   | Age (Mean ± SD)<br>Age Range                                                                                 | Modality | Equation Used       | Notes                                                                                                                                                                                                                                                                                                                                                                                                                                                                                                                                                           |
|-------------------------------------|----------|--------------------------------------------------------------------------------------------------------------|----------|---------------------|-----------------------------------------------------------------------------------------------------------------------------------------------------------------------------------------------------------------------------------------------------------------------------------------------------------------------------------------------------------------------------------------------------------------------------------------------------------------------------------------------------------------------------------------------------------------|
| Hebestreit et al., 2022 [168]       | 52M/65F* | Intervention:<br>25.3 (11.4)<br>?<br><br>Control:<br>22.8 (10.8)<br>?<br><br>Whole Group Range:<br>>12 years | Cycle    | Orenstein, 1993     | *Sample of n = 117 is at baseline. Data for VO <sub>2peak</sub> at 12-month follow up of n = 103.<br><br>Paper was ePub ahead of print in 2021, but given full record in 2022. Appeared in 2021 search, so included in this review.<br><br>Paper does not explicitly state procedures, but refers to a previously published protocol paper (Hebestreit et al., 2018, BMC Pulm Med, 18(1):31) which indicates cycle ergometry and use of Orenstein: "A detailed description of the methodology is available in the online supplementary material and elsewhere". |
| Reuveny et al., 2022 [169]          | 12M/8F   | Low BR: *<br>33<br>27-40<br><br>Normal BR:<br>35<br>16-58                                                    | Cycle    | Hansen et al., 1984 | *Participants split into two groups, based upon breathing reserve (BR): Low BR (<15%); Normal BR (>15%). Median age and range for both groups provided.<br><br>Paper was ePub ahead of print in 2021, but given full record in 2022. Appeared in 2021 search, so included in this review.                                                                                                                                                                                                                                                                       |
| Revuelta-Iniesta et al., 2022 [170] | 48M/42F* | 16.6 (13.0-25.4)*<br>median (IQR)                                                                            | Cycle    | Unknown             | *Age data presented as median (IQR). Of whole sample, only n = 78 (87%) performed CPET.<br><br>Paper was ePub ahead of print in 2021, but given full record in 2022. Appeared in 2021 search, so included in this review.<br><br>Equation not stated in manuscript.                                                                                                                                                                                                                                                                                             |

ACCP: American College of Chest Physicians; ACSM: American College of Sports Medicine; ATS: American Thoracic Society; BR: breathing reserve; CFRD: cystic fibrosis related diabetes; CPET: cardiopulmonary exercise test; dF508: delta-F508 mutation [Class 2 mutation causing CF]; DLTx: double lung transplant; ECFS: European Cystic Fibrosis Society; ERS: European Respiratory Society; F: female; FEV<sub>1</sub>: forced expiratory volume in one second; FVC: forced vital capacity; HLTx: heart-lung transplant; IGT: impaired glucose tolerance; IQR: interquartile range; LCI: lung clearance index; LTx: lung transplant; M: male; MRI: magnetic resonance imaging; NGT: normal glucose tolerance; NVL: no ventilatory limitation; pwCF: person with cystic fibrosis; RV: residual volume; SD: standard deviation; SE: standard error; SEM: standard error of mean; SH: static hyperinflation; SLTx: single lung transplant; TLC: total lung capacity; VL: ventilatory limitation; VO<sub>2max</sub>: maximal oxygen uptake; W<sub>max</sub>: maximal workload.

## REFERENCES

- 1 Hjeltnes N, Stanghelle JK, Skyberg D. Pulmonary function and oxygen uptake during exercise in 16 year old boys with cystic fibrosis. *Acta Paediatrica Scandinavica* 1984;**73**:548–53. doi:10.1111/j.1651-2227.1984.tb09969.x
- 2 Edlund LD, French RW, Herbst JJ, *et al.* Effects of a Swimming Program on Children With Cystic Fibrosis. *American Journal of Diseases of Children* 1986;**140**:80–3. doi:10.1001/archpedi.1986.02140150082044
- 3 Marcotte JE, Canny GJ, Grisdale R, *et al.* Effects of nutritional status on exercise performance in advanced cystic fibrosis. *Chest* 1986;**90**:375–9. doi:10.1378/chest.90.3.375
- 4 Marcotte JE, Grisdale RK, Levison H, *et al.* Multiple factors limit exercise capacity in cystic fibrosis. *Pediatric Pulmonology* 1986;**2**:274–81. doi:10.1002/ppul.1950020505
- 5 Stanghelle JK, Hjeltnes N, Michalsen H, *et al.* Pulmonary Function and Oxygen Uptake during Exercise in 11-Year-Old Patients with Cystic Fibrosis. *Acta Paediatrica Scandinavia* 1986;**75**:657–61. doi:10.1111/j.1651-2227.1986.tb10267.x
- 6 Versteegh FG, Neijens HJ, Bogaard JM, *et al.* Relationship between pulmonary function, O<sub>2</sub> saturation during sleep and exercise, and exercise responses in children with cystic fibrosis. *Advances in Cardiology* 1986;**35**:151–5. doi:10.1159/000413448
- 7 Browning IB, D'Alonzo GE, Tobin MJ. Importance of respiratory rate as an indicator of respiratory dysfunction in patients with cystic fibrosis. *Chest* 1990;**97**:1317–21. doi:10.1378/chest.97.6.1317
- 8 Versteegh FGA, Bogaard JM, Raatgever JW, *et al.* Relationship between airway obstruction, desaturation during exercise and nocturnal hypoxaemia in cystic fibrosis patients. *European Respiratory Journal* 1990;**3**:68–73.
- 9 Heijerman HG, Bakker W, Sterk PJ, *et al.* Oxygen-assisted exercise training in adult cystic fibrosis patients with pulmonary limitation to exercise. *International Journal of Rehabilitation Research* 1991;**14**:101–15. doi:10.1097/00004356-199106000-00002
- 10 Regnis JA, Alison JA, Henke KG, *et al.* Changes in end-expiratory lung volume during exercise in cystic fibrosis relate to severity of lung disease. *American Review of Respiratory Disease* 1991;**144**:507–12. doi:10.1164/ajrccm/144.3\_Pt\_1.507
- 11 Heijerman HG, Bakker W, Sterk PJ, *et al.* Long-term effects of exercise training and hyperalimentation in adult cystic fibrosis patients with severe pulmonary dysfunction. *International Journal of Rehabilitation Research* 1992;**15**:252–7. doi:10.1097/00004356-199209000-00011
- 12 Nixon PA, Orenstein DM, Kelsey SF, *et al.* The prognostic value of exercise testing in patients with cystic fibrosis. *New England Journal of Medicine* 1992;**327**:1785–8. doi:10.1056/NEJM199212173272504
- 13 Williams TJ, Patterson GA, McClean PA, *et al.* Maximal exercise testing in single and double lung transplant recipients. *The American Review of Respiratory Disease* 1992;**145**:101–5. doi:10.1164/ajrccm/145.1.101
- 14 Freeman W, Stableforth DE, Cayton RM, *et al.* Endurance exercise capacity in adults with cystic fibrosis. *Respiratory Medicine* 1993;**87**:541–9. doi:10.1016/0954-6111(93)90011-n
- 15 Henke KG, Regnis JA, Bye PTP. Benefits of Continuous Positive Airway Pressure during Exercise in Cystic Fibrosis and Relationship to Disease Severity. *American Review of Respiratory Disease* 1993;**148**:1272–6. doi:10.1164/ajrccm/148.5.1272
- 16 Kaplan TA, Moccia-Loos G, Rabin M, *et al.* Lack of effect of delta F508 mutation on aerobic capacity in patients with cystic fibrosis. *Clinical Journal of Sport Medicine* 1996;**6**:226–31. doi:10.1097/00042752-199610000-00004

- 17 Alison JA, Regnis JA, Donnelly PM, *et al.* Evaluation of supported upper limb exercise capacity in patients with cystic fibrosis. *American Journal of Respiratory and Critical Care Medicine* 1997;**156**:1541–8. doi:10.1164/ajrccm.156.5.97-02034
- 18 Evans AB, Al-Himyary AJ, Hrovat MI, *et al.* Abnormal skeletal muscle oxidative capacity after lung transplantation by 31P-MRS. *American Journal of Respiratory and Critical Care Medicine* 1997;**155**:615–21. doi:10.1164/ajrccm.155.2.9032203
- 19 Moorcroft AJ, Dodd ME, Webb AK. Exercise testing and prognosis in adult cystic fibrosis. *Thorax* 1997;**52**:291–3. doi:10.1136/thx.52.3.291
- 20 Moorcroft AJ, Dodd ME, Webb AK. Long-term Change in Exercise Capacity, Body Mass, and Pulmonary Function in Adults With Cystic Fibrosis. *Chest* 1997;**111**:338–43. doi:10.1016/s0012-3692(15)52531-2
- 21 Oelberg DA, Systrom DM, Markowitz DH, *et al.* Exercise performance in cystic fibrosis before and after bilateral lung transplantation. *The Journal of Heart and Lung Transplantation* 1998;**17**:1104–12.
- 22 Pellegrino R, Rodarte JR, Frost AE, *et al.* Breathing by double-lung recipients during exercise: response to expiratory threshold loading. *American Journal of Respiratory and Critical Care Medicine* 1998;**157**:106–10. doi:10.1164/ajrccm.157.1.9611092
- 23 Tuzin BJ, Mulvihill MM, Kilbourn KM, *et al.* Increasing Physical Activity of Children with Cystic Fibrosis: A Home-Based Family Intervention. *Pediatric Exercise Science* 1998;**10**:57–68. doi:10.1123/pes.10.1.57
- 24 Boas SR, Danduran MJ, McColley SA. Energy metabolism during anaerobic exercise in children with cystic fibrosis and asthma. *Medicine and Science in Sports and Exercise* 1999;**31**:1242–9. doi:10.1097/00005768-199909000-00003
- 25 Bradley J, Howard J, Wallace E, *et al.* Validity of a modified shuttle test in adult cystic fibrosis. *Thorax* 1999;**54**:437–9. doi:10.1136/thx.54.5.437
- 26 McKone EF, Barry SC, FitzGerald MX, *et al.* Reproducibility of maximal exercise ergometer testing in patients with cystic fibrosis. *Chest* 1999;**116**:363–8. doi:10.1378/chest.116.2.363
- 27 Schwaiblmair M, Reichenspurner H, Müller C, *et al.* Cardiopulmonary exercise testing before and after lung and heart-lung transplantation. *American Journal of Respiratory and Critical Care Medicine* 1999;**159**:1277–83. doi:10.1164/ajrccm.159.4.9805113
- 28 Boas SR, Danduran MJ, McColley SA, *et al.* Immune modulation following aerobic exercise in children with cystic fibrosis. *International Journal of Sports Medicine* 2000;**21**:294–301. doi:10.1055/s-2000-311
- 29 Boas SR, Danduran MJ, McBride AL, *et al.* Postexercise immune correlates in children with and without cystic fibrosis. *Medicine and Science in Sports and Exercise* 2000;**32**:1997–2004. doi:10.1097/00005768-200012000-00005
- 30 Fink G, Lebzelter J, Blau C, *et al.* The sky is the limit: exercise capacity 10 years post-heart-lung transplantation. *Transplantation Proceedings* 2000;**32**:733–4. doi:10.1016/s0041-1345(00)00961-1
- 31 Moser C, Tirakitsoontorn P, Nussbaum E, *et al.* Muscle size and cardiorespiratory response to exercise in cystic fibrosis. *American Journal of Respiratory and Critical Care Medicine* 2000;**162**:1823–7. doi:10.1164/ajrccm.162.5.2003057
- 32 Frangolias DD, Wilcox PG. Predictability of oxygen desaturation during sleep in patients with cystic fibrosis: clinical, spirometric, and exercise parameters. *Chest* 2001;**119**:434–41. doi:10.1378/chest.119.2.434



- 33 Karila C, de Blic J, Waernessyckle S, *et al.* Cardiopulmonary exercise testing in children: An individualized protocol for workload increase. *Chest* 2001;**120**:81–7. doi:10.1378/chest.120.1.81
- 34 Poulou E, Nanas S, Papamichalopoulos A, *et al.* Prolonged oxygen kinetics during early recovery from maximal exercise in adult patients with cystic fibrosis. *Chest* 2001;**119**:1073–8. doi:10.1378/chest.119.4.1073
- 35 Blau H, Mussaffi-Georgy H, Fink G, *et al.* Effects of an Intensive 4-Week Summer Camp on Cystic Fibrosis. *Chest* 2002;**121**:1117. doi:10.1378/chest.121.4.1117
- 36 Hütler M, Schnabel D, Staab D, *et al.* Effect of growth hormone on exercise tolerance in children with cystic fibrosis. *Medicine and Science in Sports and Exercise* 2002;**34**:567–72. doi:10.1097/00005768-200204000-00001
- 37 McKone EF, Barry SC, FitzGerald MX, *et al.* The role of supplemental oxygen during submaximal exercise in patients with cystic fibrosis. *European Respiratory Journal* 2002;**20**:134–42. doi:10.1183/09031936.02.00492001
- 38 Thin AG, Linnane SJ, McKone EF, *et al.* Use of the gas exchange threshold to noninvasively determine the lactate threshold in patients with cystic fibrosis. *Chest* 2002;**121**:1761–70. doi:10.1378/chest.121.6.1761
- 39 Frangolias DD, Paré PD, Kendler DL, *et al.* Role of exercise and nutrition status on bone mineral density in cystic fibrosis. *Journal of Cystic Fibrosis* 2003;**2**:163–70. doi:10.1016/s1569-1993(03)00087-0
- 40 Frangolias DD, Holloway CL, Vedal S, *et al.* Role of Exercise and Lung Function in Predicting Work Status in Cystic Fibrosis. *American Journal of Respiratory and Critical Care Medicine* 2003;**167**:150–7. doi:10.1164/rccm.2202053
- 41 Klijn PHC, van der Net J, Kimpen JL, *et al.* Longitudinal determinants of peak aerobic performance in children with cystic fibrosis. *Chest* 2003;**124**:2215–9. doi:10.1378/chest.124.6.2215
- 42 Klijn PH, Terheggen-Lagro SW, Van Der Ent CK, *et al.* Anaerobic exercise in pediatric cystic fibrosis. *Pediatric Pulmonology* 2003;**36**:223–9. doi:10.1002/ppul.10337
- 43 Sexauer WP, Cheng H-K, Fiel SB. Utility of the breathing reserve index at the anaerobic threshold in determining ventilatory-limited exercise in adult cystic fibrosis patients. *Chest* 2003;**124**:1469–75. doi:10.1378/chest.124.4.1469
- 44 Klijn PHC, Oudshoorn A, van der Ent CK, *et al.* Effects of anaerobic training in children with cystic fibrosis. *Chest* 2004;**125**:1299–305. doi:10.1378/chest.125.4.1299
- 45 Moorcroft AJ, Dodd ME, Morris J, *et al.* Individualised unsupervised exercise training in adults with cystic fibrosis: a 1 year randomised controlled trial. *Thorax* 2004;**59**:1074–80. doi:10.1136/thx.2003.015313
- 46 Pinet C, Scillia P, Cassart M, *et al.* Preferential reduction of quadriceps over respiratory muscle strength and bulk after lung transplantation for cystic fibrosis. *Thorax* 2004;**59**:783–9. doi:10.1136/thx.2004.021766
- 47 Dodd JD, Barry SC, Daly LE, *et al.* Inhaled beta-agonists improve lung function but not maximal exercise capacity in cystic fibrosis. *Journal of Cystic Fibrosis* 2005;**4**:101–5. doi:10.1016/j.jcf.2004.11.004
- 48 Fournier C, Bosquet L, Leroy S, *et al.* Évaluation de l'activité physique quotidienne de patients adultes atteints de mucoviscidose [Measurement of daily physical activity in patients with cystic fibrosis]. *Revue des Maladies Respiratoires* 2005;**22**:63–9. doi:10.1016/s0761-8425(05)85437-3

- 49 Hebestreit H, Hebestreit A, Trusen A, *et al.* Oxygen Uptake Kinetics Are Slowed in Cystic Fibrosis. *Medicine and Science in Sports and Exercise* 2005;**37**:10–7. doi:10.1249/01.mss.0000150065.97657.7b
- 50 McKone EF, Barry SC, Fitzgerald MX, *et al.* Role of arterial hypoxemia and pulmonary mechanics in exercise limitation in adults with cystic fibrosis. *Journal of Applied Physiology* 2005;**99**:1012–8. doi:10.1152/japplphysiol.00475.2004
- 51 Moorcroft AJ, Dodd ME, Morris J, *et al.* Symptoms, lactate and exercise limitation at peak cycle ergometry in adults with cystic fibrosis. *European Respiratory Journal* 2005;**25**:1050–6. doi:10.1183/09031936.05.00011404
- 52 Dodd JD, Barry SC, Gallagher CG. Respiratory factors do not limit maximal symptom-limited exercise in patients with mild cystic fibrosis lung disease. *Respiratory Physiology & Neurobiology* 2006;**152**:176–85. doi:10.1016/j.resp.2005.08.003
- 53 Dodd JD, Barry SC, Barry RB, *et al.* Thin-section CT in patients with cystic fibrosis: correlation with peak exercise capacity and body mass index. *Radiology* 2006;**240**:236–45. doi:10.1148/radiol.2401050502
- 54 Hebestreit H, Kieser S, Rüdiger S, *et al.* Physical activity is independently related to aerobic capacity in cystic fibrosis. *European Respiratory Journal* 2006;**28**:734–9. doi:10.1183/09031936.06.00128605
- 55 Reinsma GD, ten Hacken NHT, Grevink RG, *et al.* Limiting factors of exercise performance 1 year after lung transplantation. *The Journal of Heart and Lung Transplantation* 2006;**25**:1310–6. doi:10.1016/j.healun.2006.08.008
- 56 Barry SC, Gallagher CG. The repeatability of submaximal endurance exercise testing in cystic fibrosis. *Pediatric Pulmonology* 2007;**42**:75–82. doi:10.1002/ppul.20547
- 57 Barry PJ, Waterhouse DF, Reilly CM, *et al.* Androgens, exercise capacity, and muscle function in cystic fibrosis. *Chest* 2008;**134**:1258–64. doi:10.1378/chest.08-1091
- 58 Dodd JD, Barry SC, Barry RB, *et al.* Bone mineral density in cystic fibrosis: benefit of exercise capacity. *Journal of Clinical Densitometry* 2008;**11**:537–42. doi:10.1016/j.jocd.2008.05.095
- 59 Hubert D, Aubourg F, Fauroux B, *et al.* Exhaled nitric oxide in cystic fibrosis: Relationships with airway and lung vascular impairments. *European Respiratory Journal* 2009;**34**:117–24. doi:10.1183/09031936.00164508
- 60 Ruf K, Hebestreit H. Exercise-induced hypoxemia and cardiac arrhythmia in cystic fibrosis. *Journal of Cystic Fibrosis* 2009;**8**:83–90. doi:10.1016/j.jcf.2008.09.008
- 61 Troosters T, Langer D, Vrijzen B, *et al.* Skeletal muscle weakness, exercise tolerance and physical activity in adults with cystic fibrosis. *European Respiratory Journal* 2009;**33**:99–106. doi:10.1183/09031936.00091607
- 62 Zavorsky GS, Kryder JR, Jacob SV, *et al.* Exercise capacity of children with pediatric lung disease. *Clinical and Investigative Medicine* 2009;**32**:E302. doi:10.25011/cim.v32i6.10666
- 63 Groen WG, Hulzebos HJ, Helders PJ, *et al.* Oxygen uptake to work rate slope in children with a heart, lung or muscle disease. *International Journal of Sports Medicine* 2010;**31**:202–6. doi:10.1055/s-0029-1243644
- 64 Gruet M, Brisswalter J, Mely L, *et al.* Clinical utility of the oxygen uptake efficiency slope in cystic fibrosis patients. *Journal of Cystic Fibrosis* 2010;**9**:307–13. doi:10.1016/j.jcf.2010.03.003

- 65 McBride MG, Schall JI, Zemel BS, *et al.* Clinical and genetic correlates of exercise performance in young children with cystic fibrosis. *Perceptual and Motor Skills* 2010;**110**:995–1009. doi:10.2466/pms.110.3c.995-1009
- 66 Nguyen S, Leroy S, Cracowski C, *et al.* Intérêt pronostique de l'épreuve fonctionnelle d'exercice au cours de la mucoviscidose de l'adulte [Prognostic value of clinical exercise testing in adult patients with cystic fibrosis]. *Revue des Maladies Respiratoires* 2010;**27**:219–25. doi:10.1016/j.rmr.2010.01.009
- 67 Bartels MN, Armstrong HF, Gerardo RE, *et al.* Evaluation of pulmonary function and exercise performance by cardiopulmonary exercise testing before and after lung transplantation. *Chest* 2011;**140**:1604–11. doi:10.1378/chest.10-2721
- 68 Dwyer TJ, Alison JA, McKeough ZJ, *et al.* Effects of exercise on respiratory flow and sputum properties in patients with cystic fibrosis. *Chest* 2011;**139**:870–7. doi:10.1378/chest.10-1158
- 69 Gruber W, Orenstein DM, Braumann KM, *et al.* Effects of an exercise program in children with cystic fibrosis: are there differences between females and males? *The Journal of Pediatrics* 2011;**158**:71–6. doi:10.1016/j.jpeds.2010.07.033
- 70 Hulzebos HJ, Snieder H, van der Et J, *et al.* High-intensity interval training in an adolescent with cystic fibrosis: a physiological perspective. *Physiotherapy Theory and Practice* 2011;**27**:231–7. doi:10.3109/09593985.2010.483266
- 71 Leroy S, Perez T, Nevieri R, *et al.* Determinants of dyspnea and alveolar hypoventilation during exercise in cystic fibrosis: impact of inspiratory muscle endurance. *Journal of Cystic Fibrosis* 2011;**10**:159–65. doi:10.1016/j.jcf.2010.12.006
- 72 Tejero Garcia S, Giraldez Sanchez MA, Cejudo P, *et al.* Bone health, daily physical activity, and exercise tolerance in patients with cystic fibrosis. *Chest* 2011;**140**:475–81. doi:10.1378/chest.10-1508
- 73 Traylor BR, Wheatley CM, Skrentny TT, *et al.* Influence of Genetic variation of the beta2-Adrenergic receptor on lung diffusion in patients with cystic fibrosis. *Pulmonary Pharmacology and Therapeutics* 2011;**24**:610–6. doi:10.1016/j.pupt.2011.06.001
- 74 Vallier JM, Gruet M, Mely L, *et al.* Neuromuscular fatigue after maximal exercise in patients with cystic fibrosis. *Journal of Electromyography & Kinesiology* 2011;**21**:242–8. doi:10.1016/j.jelekin.2010.10.010
- 75 Vivodtzev I, Pison C, Guerrero K, *et al.* Benefits of home-based endurance training in lung transplant recipients. *Respiratory Physiology & Neurobiology* 2011;**177**:189–98. doi:10.1016/j.resp.2011.02.005
- 76 Werkman MS, Hulzebos HJ, Arets HG, *et al.* Is static hyperinflation a limiting factor during exercise in adolescents with cystic fibrosis? *Pediatric Pulmonology* 2011;**46**:119–24. doi:10.1002/ppul.21329
- 77 Wheatley CM, Foxx-Lupo WT, Cassuto NA, *et al.* Impaired lung diffusing capacity for nitric oxide and alveolar-capillary membrane conductance results in oxygen desaturation during exercise in patients with cystic fibrosis. *Journal of Cystic Fibrosis* 2011;**10**:45–53. doi:10.1016/j.jcf.2010.09.006
- 78 Armstrong HF, Garber CE, Bartels MN. Exercise testing parameters associated with post lung transplant mortality. *Respiratory Physiology & Neurobiology* 2012;**181**:118–22. doi:10.1016/j.resp.2012.02.003
- 79 Bongers BC, Hulzebos EHJ, Arets BGM, *et al.* Validity of the oxygen uptake efficiency slope in children with cystic fibrosis and mild-to-moderate airflow obstruction. *Pediatric Exercise Science* 2012;**24**:129–41. doi:10.1123/pes.24.1.129

- 80 Manika K, Pitsiou GG, Boutou AK, *et al.* The Impact of Pulmonary Arterial Pressure on Exercise Capacity in Mild-to-Moderate Cystic Fibrosis: A Case Control Study. *Pulmonary Medicine* 2012;**2012**:252345. doi:10.1155/2012/252345
- 81 Nguyen T, Obeid J, Ploeger HE, *et al.* Inflammatory and growth factor response to continuous and intermittent exercise in youth with cystic fibrosis. *Journal of Cystic Fibrosis* 2012;**11**:108–18. doi:10.1016/j.jcf.2011.10.001
- 82 Ruf K, Fehn S, Bachmann M, *et al.* Validation of activity questionnaires in patients with cystic fibrosis by accelerometry and cycle ergometry. *BMC Medical Research Methodology* 2012;**12**:43. doi:10.1186/1471-2288-12-43
- 83 van de Weert-van Leeuwen PB, Slieker MG, Hulzebos HJ, *et al.* Chronic infection and inflammation affect exercise capacity in cystic fibrosis. *European Respiratory Journal* 2012;**39**:893–8. doi:10.1183/09031936.00086211
- 84 Armstrong HF, Schulze PC, Kato TS, *et al.* Right ventricular stroke work index as a negative predictor of mortality and initial hospital stay after lung transplantation. *The Journal of Heart and Lung Transplantation* 2013;**32**:603–8. doi:10.1016/j.healun.2013.03.004
- 85 Ledger SJ, Owen E, Prasad SA, *et al.* A pilot outreach physiotherapy and dietetic quality improvement initiative reduces IV antibiotic requirements in children with moderate-severe cystic fibrosis. *Journal of Cystic Fibrosis* 2013;**12**:766–72. doi:10.1016/j.jcf.2013.01.003
- 86 Moco VJR, Vigario PS, Almeida VP, *et al.* Pulmonary disease severity and peripheral muscle function as limiting factors for exercise capacity in adult patients with cystic fibrosis. *Isokinetics and Exercise Science* 2013;**21**:219–26. doi:10.3233/IES-130508
- 87 Poore S, Berry B, Eidson D, *et al.* Evidence of vascular endothelial dysfunction in young patients with cystic fibrosis. *Chest* 2013;**143**:939–45. doi:10.1378/chest.12-1934
- 88 Prevotat A, Denis F, Leroy S, *et al.* Activité physique quotidienne de patients adultes atteints de mucoviscidose/Daily physical activity in adult patients with cystic fibrosis. *Revue de Pneumologie Clinique* 2013;**69**:3–9. doi:10.1016/j.pneumo.2012.11.006
- 89 Savi D, Quattrucci S, Internullo M, *et al.* Measuring habitual physical activity in adults with cystic fibrosis. *Respiratory Medicine* 2013;**107**:1888–94. doi:10.1016/j.rmed.2013.09.012
- 90 Sovtic AD, Minic PB, Kosutic J, *et al.* Static Hyperinflation Is Associated With Decreased Peak Exercise Performance in Children With Cystic Fibrosis. *Respiratory Care* 2013;**58**:291–7. doi:10.4187/respcare.01946
- 91 Vivodtzev I, Decorte N, Wuyam B, *et al.* Benefits of neuromuscular electrical stimulation prior to endurance training in patients with cystic fibrosis and severe pulmonary dysfunction. *Chest* 2013;**143**:485–93. doi:10.1378/chest.12-0584
- 92 Barry PJ, Horsley AR. Discordance between clinical, physiological, and radiological measures in cystic fibrosis. *Respirology Case Reports* 2014;**2**:129–31. doi:10.1002/rcr2.69
- 93 Brun J, Roubille C, Le Quellec A, *et al.* Une nouvelle observation d'intolérance à l'effort avec hypokaliémie chez un porteur sain de la mucoviscidose [A new case report of exercise intolerance with hypokalemia in a healthy carrier of cystic fibrosis]. *Science & Sports* 2014;**29**:46–50. doi:10.1016/j.scispo.2013.10.002
- 94 Cohen SP, Orenstein DM. How does heart rate recovery after sub-maximal exercise correlate with maximal exercise testing in children with CF? *Journal of Cystic Fibrosis* 2014;**13**:712–5. doi:10.1016/j.jcf.2014.05.011
- 95 Hebestreit H, Schmid K, Kieser S, *et al.* Quality of life is associated with physical activity and fitness in cystic fibrosis. *BMC Pulmonary Medicine* 2014;**14**:26. doi:10.1186/1471-2466-14-26

- 96 Hulzebos EH, Bomhof-Roordink H, van de Weert-van Leeuwen PB, *et al.* Prediction of mortality in adolescents with cystic fibrosis. *Medicine and Science in Sports and Exercise* 2014;**46**:2047–52. doi:10.1249/MSS.0000000000000344
- 97 Pastre J, Prevotat A, Tardif C, *et al.* Determinants of exercise capacity in cystic fibrosis patients with mild-to-moderate lung disease. *BMC Pulmonary Medicine* 2014;**14**:74. doi:10.1186/1471-2466-14-74
- 98 van de Weert-van Leeuwen PB, Hulzebos HJ, Werkman MS, *et al.* Chronic inflammation and infection associate with a lower exercise training response in cystic fibrosis adolescents. *Respiratory Medicine* 2014;**108**:445–52. doi:10.1016/j.rmed.2013.08.012
- 99 Armstrong HF, Gonzalez-Costello J, Thirapatarapong W, *et al.* Effect of lung transplantation on heart rate response to exercise. *Heart & Lung* 2015;**44**:246–50. doi:10.1016/j.hrtlng.2015.01.014
- 100 Bongers BC, Werkman MS, Arets HG, *et al.* A possible alternative exercise test for youths with cystic fibrosis: the steep ramp test. *Medicine and Science in Sports and Exercise* 2015;**47**:485–92. doi:10.1249/MSS.0000000000000440
- 101 Erickson ML, Seigler N, McKie KT, *et al.* Skeletal muscle oxidative capacity in patients with cystic fibrosis. *Experimental Physiology* 2015;**100**:545–52. doi:10.1113/EP085037
- 102 Fielding J, Brantley L, Seigler N, *et al.* Oxygen uptake kinetics and exercise capacity in children with cystic fibrosis. *Pediatric Pulmonology* 2015;**50**:647–54. doi:10.1002/ppul.23189
- 103 Quon BS, Wilkie SS, Molgat-Seon Y, *et al.* Cardiorespiratory and sensory responses to exercise in adults with mild cystic fibrosis. *Journal of Applied Physiology* 2015;**119**:1289–96. doi:10.1152/japplphysiol.00692.2015
- 104 Savi D, Di Paolo M, Simmonds N, *et al.* Relationship between daily physical activity and aerobic fitness in adults with cystic fibrosis. *BMC Pulmonary Medicine* 2015;**15**:59. doi:10.1186/s12890-015-0036-9
- 105 Stevens D, Oades PJ, Williams CA. Airflow limitation following cardiopulmonary exercise testing and heavy-intensity intermittent exercise in children with cystic fibrosis. *European Journal of Pediatrics* 2015;**174**:251–7. doi:10.1007/s00431-014-2387-2
- 106 Van Iterson EH, Karpen SR, Baker SE, *et al.* Impaired cardiac and peripheral hemodynamic responses to inhaled beta(2)-agonist in cystic fibrosis. *Respiratory Research* 2015;**16**:103. doi:10.1186/s12931-015-0270-y
- 107 Visschers NCA, Hulzebos EH, van Brussel M, *et al.* Comparing four non-invasive methods to determine the ventilatory anaerobic threshold during cardiopulmonary exercise testing in children with congenital heart or lung disease. *Clinical Physiology and Functional Imaging* 2015;**35**:451–9. doi:10.1111/cpf.12183
- 108 Wheatley CM, Baker SE, Morgan MA, *et al.* Effects of exercise intensity compared to albuterol in individuals with cystic fibrosis. *Respiratory Medicine* 2015;**109**:463–74. doi:10.1016/j.rmed.2014.12.002
- 109 Wheatley CM, Baker SE, Morgan MA, *et al.* Moderate intensity exercise mediates comparable increases in exhaled chloride as albuterol in individuals with cystic fibrosis. *Respiratory Medicine* 2015;**109**:1001–11. doi:10.1016/j.rmed.2015.05.018
- 110 Avramidou V, Hatziagorou E, Kampouras A, *et al.* Lung Clearance Index and Exercise Capacity among Children with Cystic Fibrosis (Cf) and Non-Cf Bronchiectasis Over A Two Year Period. *EC Pulmonology and Respiratory Medicine* 2016;**2**:134–42.
- 111 Gruet M, Decorte N, Mely L, *et al.* Skeletal muscle contractility and fatigability in adults with cystic fibrosis. *Journal of Cystic Fibrosis* 2016;**15**:e1-8. doi:10.1016/j.jcf.2015.05.004



- 112 Gruet M, Peyre-Tartaruga LA, Mely L, *et al.* The 1-minute sit-to-stand test in adults with cystic fibrosis: Correlations with cardiopulmonary exercise test, 6-minute walk test, and quadriceps strength. *Respiratory Care* 2016;**61**:1620–8. doi:10.4187/respcare.04821
- 113 Hatziaiorou E, Kampouras A, Avramidou V, *et al.* Exercise responses are related to structural lung damage in CF pulmonary disease. *Pediatric Pulmonology* 2016;**51**:914–20. doi:10.1002/ppul.23474
- 114 Radtke T, Puhan MA, Hebestreit H, *et al.* The 1-min sit-to-stand test—A simple functional capacity test in cystic fibrosis? *Journal of Cystic Fibrosis* 2016;**15**:223–6. doi:10.1016/j.jcf.2015.08.006
- 115 Rodriguez-Miguel P, Thomas J, Seigler N, *et al.* Evidence of microvascular dysfunction in patients with cystic fibrosis. *American Journal of Physiology - Heart and Circulatory Physiology* 2016;**310**:H1479–85. doi:10.1152/ajpheart.00136.2016
- 116 Tomlinson OW, Barker AR, Oades PJ, *et al.* Exercise capacity following a percutaneous endoscopic gastrostomy in a young female with cystic fibrosis: a case report. *Physiological Reports* 2016;**4**:e12904. doi:10.14814/phy2.12904
- 117 Vallier J-M, Rouissi M, Mely L, *et al.* Physiological Responses of the Modified Shuttle Test in Adults With Cystic Fibrosis. *Journal of Cardiopulmonary Rehabilitation and Prevention* 2016;**36**:288–92. doi:10.1097/HCR.0000000000000181
- 118 Van Iterson EH, Wheatley CM, Baker SE, *et al.* The Coupling of Peripheral Blood Pressure and Ventilatory Responses during Exercise in Young Adults with Cystic Fibrosis. *PLoS One* 2016;**11**:e0168490. doi:10.1371/journal.pone.0168490
- 119 Van Iterson EH, Wheatley CM, Baker SE, *et al.* The relationship between cardiac hemodynamics and exercise tolerance in cystic fibrosis. *Heart & Lung* 2016;**45**:283–90. doi:10.1016/j.hrtlng.2016.03.001
- 120 Decorte N, Gruet M, Camara B, *et al.* Absence of calf muscle metabolism alterations in active cystic fibrosis adults with mild to moderate lung disease. *Journal of Cystic Fibrosis* 2017;**16**:98–106. doi:10.1016/j.jcf.2016.05.010
- 121 Dwyer TJ, Zainuldin R, Daviskas E, *et al.* Effects of treadmill exercise versus Flutter(R) on respiratory flow and sputum properties in adults with cystic fibrosis: a randomised, controlled, cross-over trial. *BMC Pulmonary Medicine* 2017;**17**:14. doi:10.1186/s12890-016-0360-8
- 122 Edvardsen E, Akerø A, Skjøsberg OH, *et al.* Pre-flight evaluation of adult patients with cystic fibrosis: a cross-sectional study. *BMC Research Notes* 2017;**10**:84. doi:10.1186/s13104-017-2386-2
- 123 Layton AM, Armstrong HF, Baldwin MR, *et al.* Frailty and maximal exercise capacity in adult lung transplant candidates. *Respiratory Medicine* 2017;**131**:70–6. doi:10.1016/j.rmed.2017.08.010
- 124 Radtke T, Hebestreit H, Puhan MA, *et al.* The 1-min sit-to-stand test in cystic fibrosis - Insights into cardiorespiratory responses. *Journal of Cystic Fibrosis* 2017;**16**:744–51. doi:10.1016/j.jcf.2017.01.012
- 125 Tucker MA, Crandall R, Seigler N, *et al.* A single bout of maximal exercise improves lung function in patients with cystic fibrosis. *Journal of Cystic Fibrosis* 2017;**16**:752–8. doi:10.1016/j.jcf.2017.05.011
- 126 Vandekerckhove K, Keyzer M, Cornette J, *et al.* Exercise performance and quality of life in children with cystic fibrosis and mildly impaired lung function: relation with antibiotic treatments and hospitalization. *European Journal of Pediatrics* 2017;**176**:1689–96. doi:10.1007/s00431-017-3024-7

- 127 Weir E, Burns PD, Devenny A, *et al.* Cardiopulmonary exercise testing in children with cystic fibrosis: one centre's experience. *Archives of Disease in Childhood* 2017;**102**:440–4. doi:10.1136/archdischild-2016-310651
- 128 Avramidou V, Hatziaorou E, Kampouras A, *et al.* Lung clearance index (LCI) as a predictor of exercise limitation among CF patients. *Pediatric Pulmonology* 2018;**53**:81–7. doi:10.1002/ppul.23833
- 129 Causer AJ, Shute JK, Cummings MH, *et al.* Cardiopulmonary exercise testing with supramaximal verification produces a safe and valid assessment of VO<sub>2</sub>max in people with cystic fibrosis: a retrospective analysis. *Journal of Applied Physiology* 2018;**125**:1277–83. doi:10.1152/japplphysiol.00454.2018
- 130 Chelabi R, Soumagne T, Guillien A, *et al.* In cystic fibrosis, lung clearance index is sensitive to detecting abnormalities appearing at exercise in children with normal spirometry. *Respiratory Physiology & Neurobiology* 2018;**247**:9–11. doi:10.1016/j.resp.2017.08.017
- 131 Chen JJ, Cooper DM, Haddad F, *et al.* Tele-Exercise as a Promising Tool to Promote Exercise in Children With Cystic Fibrosis. *Frontiers in Public Health* 2018;**6**. doi:10.3389/fpubh.2018.00269
- 132 Foster K, Huang G, Zhang N, *et al.* Relationship between exercise capacity and glucose tolerance in cystic fibrosis. *Pediatric Pulmonology* 2018;**53**:154–61. doi:10.1002/ppul.23906
- 133 Gruet M, Mely L, Vallier JM. Overall and differentiated sensory responses to cardiopulmonary exercise test in patients with cystic fibrosis: kinetics and ability to predict peak oxygen uptake. *European Journal of Applied Physiology* 2018;**118**:2007–19. doi:10.1007/s00421-018-3923-y
- 134 Puppo H, Von Oetinger A, Benz E, *et al.* Caracterización de la capacidad física en niños del Programa Nacional de Fibrosis Quística de Chile [Characterization of the physical capacity in children of the Chilean national program of cystic fibrosis]. *Revista Chilena de Pediatría* 2018;**89**:638–43. doi:10.4067/S0370-410620180050000812
- 135 Radtke T, Hebestreit H, Gallati S, *et al.* CFTR Genotype and Maximal Exercise Capacity in Cystic Fibrosis: A Cross-sectional Study. *Annals of the American Thoracic Society* 2018;**15**:209–16. doi:10.1513/AnnalsATS.201707-570OC
- 136 Savi D, Di Paolo M, Simmonds NJ, *et al.* Is daily physical activity affected by dynamic hyperinflation in adults with cystic fibrosis? *BMC Pulmonary Medicine* 2018;**18**:60. doi:10.1186/s12890-018-0623-7
- 137 Stevens D. Static hyperinflation is associated with ventilatory limitation and exercise tolerance in adult cystic fibrosis. *The Clinical Respiratory Journal* 2018;**12**:1949–57. doi:10.1111/crj.12763
- 138 Stevens D, Neyedli HF. Clinical Model of Exercise-Related Dyspnea in Adult Patients With Cystic Fibrosis. *Journal of Cardiopulmonary Rehabilitation and Prevention* 2018;**38**:187–92. doi:10.1097/HCR.0000000000000263
- 139 Tomlinson OW, Barker AR, Chubbock LV, *et al.* Analysis of oxygen uptake efficiency parameters in young people with cystic fibrosis. *European Journal of Applied Physiology* 2018;**118**:2055–63. doi:10.1007/s00421-018-3926-8
- 140 Tucker MA, Berry B, Seigler N, *et al.* Blood flow regulation and oxidative stress during submaximal cycling exercise in patients with cystic fibrosis. *Journal of Cystic Fibrosis* 2018;**17**:256–63. doi:10.1016/j.jcf.2017.08.015
- 141 Bar-Yoseph R, Ilivitzki A, Gur M, *et al.* Exercise capacity in patients with cystic fibrosis vs. non-cystic fibrosis bronchiectasis. *PLoS One* 2019;**14**:e0217491. doi:10.1371/journal.pone.0217491



- 142 Di Paolo M, Teopompi E, Savi D, *et al.* Reduced exercise ventilatory efficiency in Cystic Fibrosis adults with normal to moderately impaired lung function. *Journal of Applied Physiology* 2019;**127**:501–12. doi:10.1152/jappphysiol.00030.2019
- 143 Dwyer TJ, Daviskas E, Zainulldin R, *et al.* Effects of exercise and airway clearance (positive expiratory pressure) on mucus clearance in cystic fibrosis: a randomised crossover trial. *European Respiratory Journal* 2019;**53**:1801793. doi:10.1183/13993003.01793-2018
- 144 Hebestreit H, Hulzebos EHJ, Schneiderman JE, *et al.* Cardiopulmonary Exercise Testing Provides Additional Prognostic Information in Cystic Fibrosis. *American Journal of Respiratory and Critical Care Medicine* 2019;**199**:987–95. doi:10.1164/rccm.201806-1110OC
- 145 Kampouras A, Hatziaiorou E, Avramidou V, *et al.* Does *Pseudomonas aeruginosa* Colonization Affect Exercise Capacity in CF? *Pulmonary Medicine* 2019;**2019**:1–5. doi:10.1155/2019/3786245
- 146 Kampouras A, Hatziaiorou E, Avramidou V, *et al.* Ventilation efficiency to exercise in patients with cystic fibrosis. *Pediatric Pulmonology* 2019;**54**:1584–90. doi:10.1002/ppul.24438
- 147 Rodriguez-Miguel P, Ishii H, Seigler N, *et al.* Sildenafil improves exercise capacity in patients with cystic fibrosis: a proof-of-concept clinical trial. *Therapeutic Advances in Chronic Disease* 2019;**10**:204062231988787. doi:10.1177/2040622319887879
- 148 Ruf K, Beer M, Kostler H, *et al.* Size-adjusted muscle power and muscle metabolism in patients with cystic fibrosis are equal to healthy controls - a case control study. *BMC Pulmonary Medicine* 2019;**19**:269. doi:10.1186/s12890-019-1039-8
- 149 Savi D, Schiavetto S, Simmonds NJ, *et al.* Effects of Lumacaftor/Ivacaftor on physical activity and exercise tolerance in three adults with cystic fibrosis. *Journal of Cystic Fibrosis* 2019;**18**:420–4. doi:10.1016/j.jcf.2019.03.001
- 150 Tucker MA, Lee N, Rodriguez-Miguel P, *et al.* Exercise testing in patients with cystic fibrosis—importance of ventilatory parameters. *European Journal of Applied Physiology* 2019;**119**:227–34. doi:10.1007/s00421-018-4018-5
- 151 Boutou AK, Manika K, Hajimitrova M, *et al.* Longitudinal changes in exercise capacity among adult cystic fibrosis patients. *Advances in Respiratory Medicine* 2020;**88**:420–3. doi:10.5603/ARM.a2020.0145
- 152 Burghard M, Berkers G, Ghijsen S, *et al.* Long-term effects of ivacaftor on nonpulmonary outcomes in individuals with cystic fibrosis, heterozygous for a S1251N mutation. *Pediatric Pulmonology* 2020;**55**:1400–5. doi:10.1002/ppul.24745
- 153 Causer AJ, Shute JK, Cummings MH, *et al.* The implications of dysglycaemia on aerobic exercise and ventilatory function in cystic fibrosis. *Journal of Cystic Fibrosis* 2020;**19**:427–33. doi:10.1016/j.jcf.2019.09.014
- 154 Di Paolo M, Di Gaeta A, Indino EL, *et al.* Pancreatic cystosis in cystic fibrosis: Sometimes a bike ride can help you decide. *Respiratory Medicine Case Reports* 2020;**29**:101018. doi:10.1016/j.rmcr.2020.101018
- 155 Sawyer A, Cavalheri V, Jenkins S, *et al.* High-Intensity Interval Training Is Effective at Increasing Exercise Endurance Capacity and Is Well Tolerated by Adults with Cystic Fibrosis. *Journal of Clinical Medicine* 2020;**9**. doi:10.3390/jcm9103098
- 156 Torvanger O, Os A, Skjonsberg OH, *et al.* Cardiorespiratory fitness on a treadmill in an adult cystic fibrosis population. *BMJ Open Sport & Exercise Medicine* 2020;**6**:e000765. doi:10.1136/bmjsem-2020-000765

- 157 Ulvestad M, Durheim MT, Kongerud JS, *et al.* Cardiorespiratory Fitness and Physical Activity following Lung Transplantation: A National Cohort Study. *Respiration* 2020;**99**:316–24. doi:10.1159/000506883
- 158 Ulvestad M, Durheim MT, Kongerud JS, *et al.* Effect of high-intensity training on peak oxygen uptake and muscular strength after lung transplantation: A randomized controlled trial. *The Journal of Heart and Lung Transplantation* 2020;**39**:859–67. doi:10.1016/j.healun.2020.06.006
- 159 Du Berry C, Westrupp N, Shanthikumar S, *et al.* Associations between peak oxygen uptake, lung function, and bronchiectasis in children with cystic fibrosis in the era of CFTR modulators. *Pediatric Pulmonology* 2021;**56**:1490–5. doi:10.1002/ppul.25275
- 160 Kampouras A, Hatziaorou E, Kalantzis T, *et al.* The Fitter the Better? Cardiopulmonary Exercise Testing Can Predict Pulmonary Exacerbations in Cystic Fibrosis. *Children* 2021;**8**:527. doi:10.3390/children8060527
- 161 Rodriguez-Miguel P, Seigler N, Ishii H, *et al.* Exercise Intolerance in Cystic Fibrosis: Importance of Skeletal Muscle. *Medicine & Science in Sports & Exercise* 2021;**53**:684–93. doi:10.1249/MSS.0000000000002521
- 162 Saez-Gimenez B, Barrecheguren M, Ramon MA, *et al.* Near-normal aerobic capacity in long-term survivors after lung transplantation. *ERJ Open Research* 2021;**7**:00381. doi:10.1183/23120541.00381-2020
- 163 Sawyer A, Cavalheri V, Jenkins S, *et al.* Endurance cycle ergometry tests performed at a sub-maximal work rate elicit peak physiological and symptom responses in adults with cystic fibrosis. *Internal Medicine Journal* 2021;**51**:1168–72. doi:10.1111/imj.15408
- 164 Vendrusculo FM, Bueno GS, Gheller MF, *et al.* Peripheral muscle strength is associated with aerobic fitness and use of antibiotics in patients with cystic fibrosis. *International Journal of Clinical Practice* 2021;**75**:e14050. doi:10.1111/ijcp.14050
- 165 Vendrusculo FM, Piva TC, Luft C, *et al.* Aerobic fitness is associated with extracellular DNA levels in the sputum of patients with cystic fibrosis. *International Journal of Clinical Practice* 2021;**75**:e14616. doi:10.1111/ijcp.14616
- 166 Willmott AGB, Holliss R, Saynor Z, *et al.* Heat acclimation improves sweat gland function and lowers sweat sodium concentration in an adult with cystic fibrosis. *Journal of Cystic Fibrosis* 2021;**20**:485–8. doi:10.1016/j.jcf.2020.07.013
- 167 Curran M, Tierney AC, Button B, *et al.* Physical Activity and Sedentary Behavior in Adults With Cystic Fibrosis: Association With Aerobic Capacity, Lung Function, Sleep, Well-Being, and Quality of Life. *Respiratory Care* 2022;**67**:339–46. doi:10.4187/respcare.09270
- 168 Hebestreit H, Kriemler S, Schindler C, *et al.* Effects of a Partially Supervised Conditioning Program in Cystic Fibrosis: An International Multicenter, Randomized Controlled Trial (ACTIVATE-CF). *American Journal of Respiratory and Critical Care Medicine* 2022;**205**:330–9. doi:10.1164/rccm.202106-1419OC
- 169 Reuveny R, Vilozni D, Dagan A, *et al.* The role of inspiratory capacity and tidal flow in diagnosing exercise ventilatory limitation in Cystic Fibrosis. *Respiratory Medicine* 2022;**192**:106713. doi:10.1016/j.rmed.2021.106713
- 170 Revuelta Iniesta R, Causer AJ, Arregui-Fresneda I, *et al.* The impact of plasma 25-hydroxyvitamin D on pulmonary function and exercise physiology in cystic fibrosis: A multicentre retrospective study. *Journal of Human Nutrition and Dietetics* 2022;**35**:363–75. doi:10.1111/jhn.12906
