# Supplementary material for: Normal reference values for aerobic fitness in cystic fibrosis: a scoping review
Source: HighWire-hosted journal article supplement (doi:10.1136/bmjsem-2022-001490), 2022-12-01
Supplement: bmjsem-2022-001490supp003_data_supplement.pdf [file bmjsem-2022-001490supp003_data_supplement.pdf]

| No. | Study                     | S | A | M | 5 | 10 | O |
|-----|---------------------------|---|---|---|---|----|---|
| 1   | Hjeltnes et al., 1984     | ? | ? | ? | N | Y  | N |
| 2   | Edlund et al., 1986       | ? | ? | ? | N | Y  | N |
| 3   | Marcotte et al., 1986a    | Y | ? | ? | Y | Y  | ? |
| 4   | Marcotte et al., 1986b    | Y | ? | ? | Y | Y  | ? |
| 5   | Stanghelle et al., 1986   | Y | Y | ? | N | N  | N |
| 6   | Versteegh et al., 1986    | ? | ? | ? | ? | ?  | ? |
| 7   | Browning et al., 1990     | Y | ? | ? | N | Y  | N |
| 8   | Versteegh et al., 1990    | ? | ? | ? | ? | ?  | ? |
| 9   | Heijerman et al., 1991    | Y | Y | Y | N | Y  | N |
| 10  | Regnis et al., 1991       | ? | ? | ? | ? | ?  | ? |
| 11  | Heijerman et al., 1992    | Y | Y | Y | N | Y  | N |
| 12  | Nixon et al., 1992        | ? | ? | ? | ? | ?  | ? |
| 13  | Williams et al., 1992     | Y | ? | ? | Y | Y  | ? |
| 14  | Freeman et al., 1993      | Y | ? | ? | Y | Y  | ? |
| 15  | Henke et al., 1993        | ? | ? | ? | ? | ?  | ? |
| 16  | Kaplan et al., 1996       | Y | ? | ? | Y | Y  | ? |
| 17  | Alison et al., 1997       | Y | Y | Y | N | N  | N |
| 18  | Evans et al., 1997        | Y | ? | N | N | Y  | N |
| 19  | Moorcroft et al., 1997a   | Y | ? | ? | N | Y  | N |
| 20  | Moorcroft et al., 1997b   | Y | ? | ? | N | Y  | N |
| 21  | Oelberg et al., 1998      | ? | ? | ? | N | N  | N |
| 22  | Pellegrino et al., 1998   | ? | ? | ? | ? | ?  | ? |
| 23  | Tuzin et al., 1998        | ? | ? | ? | ? | ?  | ? |
| 24  | Boas et al., 1999         | ? | ? | ? | N | Y  | N |
| 25  | Bradley et al., 1999      | ? | ? | ? | ? | ?  | ? |
| 26  | McKone et al., 1999       | Y | ? | ? | N | N  | N |
| 27  | Schwaiblmair et al., 1999 | ? | ? | ? | Y | Y  | ? |
| 28  | Boas et al., 2000a        | ? | ? | ? | N | Y  | N |
| 29  | Boas et al., 2000b        | ? | ? | ? | N | Y  | N |
| 30  | Fink et al., 2000         | ? | ? | ? | ? | ?  | ? |
| 31  | Moser et al., 2000        | Y | ? | ? | ? | ?  | ? |
| 32  | Frangolias & Wilcox, 2001 | Y | ? | ? | N | N  | N |
| 33  | Karlia et al., 2001       | Y | ? | ? | N | Y  | N |
| 34  | Pouliou et al., 2001      | ? | ? | ? | ? | ?  | ? |
| 35  | Blau et al., 2002         | ? | ? | ? | ? | ?  | ? |
| 36  | Hutler et al., 2002 (1)   | ? | ? | ? | N | Y  | N |
| 37  | Hutler et al., 2002 (2)   | Y | ? | ? | N | Y  | N |
| 38  | McKone et al., 2002       | Y | ? | ? | ? | ?  | ? |
| 39  | Thin et al., 2002         | Y | ? | ? | N | Y  | N |
| 40  | Frangolias et al., 2003a  | Y | ? | ? | N | N  | N |
| 41  | Frangolias et al., 2003b  | Y | ? | ? | N | N  | N |
| 42  | Klijn et al., 2003a       | Y | ? | Y | N | N  | N |
| 43  | Klijn et al., 2003b       | Y | ? | Y | N | N  | N |
| 44  | Sexauer et al., 2003      | Y | ? | ? | N | N  | N |
| 45  | Klijn et al., 2004        | Y | ? | Y | N | N  | N |
| 46  | Moorcroft et al., 2004    | Y | ? | ? | N | N  | N |
| 47  | Pinet et al., 2004        | ? | ? | ? | N | N  | N |
| 48  | Dodd et al., 2005         | Y | ? | ? | N | N  | N |
| 49  | Fournier et al., 2005     | ? | ? | ? | ? | ?  | ? |
| 50  | Hebestreit et al., 2005   | Y | ? | ? | N | N  | N |
| 51  | McKone et al., 2005       | Y | ? | ? | N | N  | N |
| 52  | Moorcroft et al., 2005    | Y | ? | ? | N | N  | N |
| 53  | Dodd et al., 2006a        | Y | ? | ? | N | N  | N |
| 54  | Dodd et al., 2006b        | Y | ? | ? | N | N  | N |
| 55  | Hebestreit et al., 2006   | Y | ? | ? | N | N  | N |
| 56  | Reinsma et al., 2006      | ? | ? | ? | ? | ?  | ? |
| 57  | Barry & Gallagher, 2007   | Y | ? | ? | N | N  | N |
| 58  | Barry et al., 2008        | Y | ? | ? | N | N  | N |
| 59  | Dodd et al., 2008         | Y | ? | ? | N | N  | N |
| 60  | Hubert et al., 2009       | Y | ? | ? | Y | Y  | ? |
| 61  | Ruf & Hebestreit, 2009    | Y | ? | ? | N | N  | N |
| 62  | Troosters et al., 2009    | Y | ? | ? | N | N  | N |
| 63  | Zavorsky et al., 2009     | Y | Y | Y | N | N  | N |
| 64  | Groen et al., 2010        | Y | ? | Y | N | N  | N |
| 65  | Gruet et al., 2010        | ? | ? | ? | ? | ?  | ? |
| 66  | McBride et al., 2010      | Y | Y | Y | N | N  | N |

| No. | Study                                 | S | A | M | 5 | 10 | O |
|-----|---------------------------------------|---|---|---|---|----|---|
| 67  | Nguyen et al., 2010                   | ? | ? | ? | Y | N  | N |
| 68  | Bartels et al., 2011                  | ? | ? | ? | ? | ?  | ? |
| 69  | Dwyer et al., 2011 (1)                | Y | Y | Y | N | N  | N |
| 70  | Dwyer et al., 2011 (2)                | Y | Y | Y | N | N  | N |
| 71  | Dwyer et al., 2011 (3)                | Y | ? | Y | N | N  | N |
| 72  | Gruber et al., 2011                   | Y | ? | ? | N | N  | N |
| 73  | Hulzebos et al., 2011                 | ? | ? | ? | ? | ?  | ? |
| 74  | Leroy et al., 2011                    | ? | ? | Y | N | N  | N |
| 75  | Tejero Garcia et al., 2011            | ? | ? | ? | ? | ?  | ? |
| 76  | Traylor et al., 2011                  | ? | ? | ? | ? | ?  | ? |
| 77  | Vallier et al., 2011                  | Y | ? | ? | N | N  | N |
| 78  | Vivodtzev et al., 2011                | ? | ? | ? | ? | ?  | ? |
| 79  | Werkman et al., 2011 (1)              | ? | ? | ? | N | N  | N |
| 80  | Werkman et al., 2011 (2)              | ? | ? | ? | N | N  | N |
| 81  | Wheatley et al., 2011                 | ? | N | ? | N | N  | N |
| 82  | Armstrong et al., 2012                | Y | Y | Y | N | N  | N |
| 83  | Bongers et al., 2012                  | ? | Y | Y | Y | Y  | ? |
| 84  | Manika et al., 2012                   | ? | ? | ? | ? | ?  | ? |
| 85  | Nguyen et al., 2012                   | ? | ? | ? | ? | ?  | ? |
| 86  | Ruf et al., 2012                      | Y | ? | ? | N | N  | N |
| 87  | van de Weert-van Leeuwen et al., 2012 | Y | ? | Y | N | N  | N |
| 88  | Armstrong et al., 2013                | ? | ? | ? | ? | ?  | ? |
| 89  | Ledger et al., 2013                   | ? | ? | ? | ? | ?  | ? |
| 90  | Moco et al., 1999                     | Y | Y | N | N | N  | N |
| 91  | Poore et al., 2013                    | ? | ? | ? | ? | ?  | ? |
| 92  | Prevotat et al., 2013                 | ? | ? | ? | ? | ?  | ? |
| 93  | Savi et al., 2013                     | ? | ? | ? | ? | ?  | ? |
| 94  | Sovtic et al., 2013                   | ? | ? | ? | ? | ?  | ? |
| 95  | Vivodtzev et al., 2013                | ? | ? | ? | ? | ?  | ? |
| 96  | Barry & Horsley, 2014                 | ? | ? | ? | ? | ?  | ? |
| 97  | Brun et al., 2014                     | ? | ? | ? | ? | ?  | ? |
| 98  | Cohen & Orenstein, 2014               | ? | ? | ? | ? | ?  | ? |
| 99  | Hebestreit et al., 2014               | Y | ? | ? | N | N  | N |
| 100 | Hulzebos et al., 2014                 | Y | Y | Y | Y | Y  | Y |
| 101 | Pastre et al., 2014                   | ? | ? | ? | N | N  | N |
| 102 | van de Weert-van Leeuwen et al., 2014 | Y | ? | Y | N | N  | N |
| 103 | Armstrong et al., 2015                | ? | ? | ? | ? | ?  | ? |
| 104 | Bongers et al., 2015                  | ? | ? | ? | Y | Y  | ? |
| 105 | Erickson et al., 2015                 | ? | ? | ? | ? | ?  | ? |
| 106 | Fielding et al., 2015                 | ? | ? | ? | ? | ?  | ? |
| 107 | Quon et al., 1988                     | Y | ? | ? | N | N  | N |
| 108 | Savi et al., 2015                     | Y | Y | Y | N | N  | N |
| 109 | Stevens et al., 2015                  | ? | ? | ? | ? | ?  | ? |
| 110 | Van Iterson et al., 2015              | ? | N | ? | N | N  | N |
| 111 | Visschers et al., 2015                | ? | ? | ? | ? | ?  | ? |
| 112 | Wheatley et al., 2015a                | ? | N | ? | N | N  | N |
| 113 | Wheatley et al., 2015b                | ? | N | ? | N | N  | N |
| 114 | Avramidou et al., 2016                | Y | ? | ? | N | N  | N |
| 115 | Gruet et al., 2016a                   | Y | ? | ? | N | N  | N |
| 116 | Gruet et al., 2016b                   | ? | ? | ? | ? | ?  | ? |
| 117 | Hatziagorou et al., 2016              | Y | ? | ? | N | N  | N |
| 118 | Radtke et al., 2016                   | ? | ? | ? | N | N  | N |
| 119 | Rodriguez-Miguel et al., 2016         | ? | ? | ? | ? | ?  | ? |
| 120 | Tomlinson et al., 2016                | Y | Y | Y | Y | Y  | Y |
| 121 | Vallier et al., 2016                  | ? | ? | ? | ? | ?  | ? |
| 122 | Van Iterson et al., 2016a             | ? | N | ? | N | N  | N |
| 123 | Van Iterson et al., 2016b             | ? | ? | ? | ? | ?  | ? |
| 124 | Decorte et al., 2017                  | Y | ? | ? | N | N  | N |
| 125 | Dwyer et al., 2017                    | ? | ? | ? | ? | ?  | ? |
| 126 | Edvardsen et al., 2017                | ? | ? | ? | ? | ?  | ? |
| 127 | Layton et al., 2017                   | ? | ? | ? | ? | ?  | ? |
| 128 | Radtke et al., 2017 (1)               | ? | ? | ? | N | N  | N |
| 129 | Radtke et al., 2017 (2)               | Y | ? | ? | N | N  | N |
| 130 | Tucker et al., 2017                   | ? | ? | ? | ? | ?  | ? |
| 131 | Vandekerckhove et al., 2017           | Y | ? | ? | Y | Y  | ? |
| 132 | Weir et al., 2017                     | ? | ? | ? | N | N  | N |

| No. | Study                         | S | A | M | 5 | 10 | O |
|-----|-------------------------------|---|---|---|---|----|---|
| 133 | Avramidou et al., 2018        | Y | ? | ? | N | N  | N |
| 134 | Causer et al., 2018           | Y | ? | ? | N | N  | N |
| 135 | Chelabi et al., 2018          | Y | ? | Y | N | N  | N |
| 136 | Chen et al., 2018             | ? | ? | ? | ? | ?  | ? |
| 137 | Foster et al., 2018 (1)       | Y | ? | ? | N | N  | N |
| 138 | Foster et al., 2018 (2)       | Y | Y | Y | N | N  | N |
| 139 | Gruet et al., 2018            | Y | Y | Y | N | N  | N |
| 140 | Puppo et al., 2018            | Y | Y | Y | N | N  | N |
| 141 | Radtke et al., 2018 (1)       | Y | ? | ? | N | N  | N |
| 142 | Radtke et al., 2018 (2)       | Y | Y | Y | N | N  | N |
| 143 | Savi et al., 2018             | Y | Y | Y | N | N  | N |
| 144 | Stevens, 2018                 | Y | ? | ? | N | N  | N |
| 145 | Stevens & Neyedli, 2018       | Y | ? | ? | N | N  | N |
| 146 | Tomlinson et al., 2018        | Y | ? | Y | Y | Y  | ? |
| 147 | Tucker et al., 2018           | ? | ? | ? | ? | ?  | ? |
| 148 | Bar-Yoseph et al., 2019       | ? | ? | ? | ? | ?  | ? |
| 149 | Di Paolo et al., 2019         | ? | ? | ? | ? | ?  | ? |
| 150 | Dwyer et al., 2019            | ? | ? | ? | ? | ?  | ? |
| 151 | Hebestreit et al., 2019 (1)   | Y | ? | ? | N | N  | N |
| 152 | Hebestreit et al., 2019 (2)   | Y | ? | ? | N | N  | N |
| 153 | Kampouras et al., 2019a       | Y | ? | ? | ? | ?  | ? |
| 154 | Kampouras et al., 2019b       | Y | ? | ? | ? | ?  | ? |
| 155 | Rodriguez-Miguel et al., 2019 | ? | ? | ? | ? | ?  | ? |
| 156 | Ruf et al., 2019              | ? | ? | ? | ? | ?  | ? |
| 157 | Savi et al., 2019             | ? | ? | ? | ? | ?  | ? |
| 158 | Tucker et al., 2019           | ? | ? | ? | ? | ?  | ? |
| 159 | Boutou et al., 2020           | ? | ? | ? | ? | ?  | ? |
| 160 | Burghard et al., 2020 (1)     | ? | ? | ? | N | Y  | N |
| 161 | Burghard et al., 2020 (2)     | Y | Y | Y | Y | Y  | Y |
| 162 | Causer et al., 2020           | Y | ? | ? | N | N  | N |
| 163 | Di Paolo et al., 2020         | ? | ? | ? | ? | ?  | ? |
| 164 | Sawyer et al., 2020           | ? | ? | ? | ? | ?  | ? |
| 165 | Torvanger et al., 2020        | Y | ? | Y | N | Y  | N |
| 166 | Ulvestad et al., 2020a        | Y | Y | Y | N | Y  | N |
| 167 | Ulvestad et al., 2020b        | Y | Y | Y | N | Y  | N |
| 168 | Du Berry et al., 2021         | ? | ? | ? | N | N  | N |
| 169 | Kampouras et al., 2021        | Y | ? | ? | N | N  | N |
| 170 | Rodriguez-Miguel et al., 2021 | ? | ? | ? | ? | ?  | ? |
| 171 | Saez-Gimenez et al., 2021     | ? | ? | ? | ? | ?  | ? |
| 172 | Sawyer et al., 2021           | Y | Y | Y | N | N  | N |
| 173 | Vendrusculo et al., 2021a     | ? | ? | ? | ? | ?  | ? |
| 174 | Vendrusculo et al., 2021b     | ? | ? | ? | ? | ?  | ? |
| 175 | Willmott et al., 2021         | Y | ? | ? | N | N  | N |
| 176 | Curran et al., 2022           | ? | ? | ? | N | N  | N |
| 177 | Hebestreit et al., 2022       | Y | ? | ? | N | N  | N |
| 178 | Reuveny et al., 2022          | ? | ? | ? | N | N  | N |
| 179 | Revuelta-Iniesta et al., 2022 | ? | ? | ? | ? | ?  | ? |

Supplemental File 3: Risk of bias for individual studies.

Where studies utilise more than one reference equation, these are provided in parentheses and the order matches with that provided in Supplemental File 1 (Table of Studies).

S: sex-match; A: age-match; M: modality-match; 5: equation published within 5 years or less of study; 10: equation published within 10 years or less of study.

Yes/Green = Yes, this is an appropriate match.

?/Yellow = This is either: a) partial match, b) unknown (insufficient information from author or source equation); c) assumed as a match, but cannot be verified.

No/Red = No, this is not an appropriate match.

Explanation and examples of RoB scoring provided in table below.

| Category  | Explanation                                                                                                         | Example                                                                                                                                                                                                                                                                                                                                                                                                                                                                                                                                                                                                                                                                                                                                                                                                                                                                                                                                                                                        |
|-----------|---------------------------------------------------------------------------------------------------------------------|------------------------------------------------------------------------------------------------------------------------------------------------------------------------------------------------------------------------------------------------------------------------------------------------------------------------------------------------------------------------------------------------------------------------------------------------------------------------------------------------------------------------------------------------------------------------------------------------------------------------------------------------------------------------------------------------------------------------------------------------------------------------------------------------------------------------------------------------------------------------------------------------------------------------------------------------------------------------------------------------|
| Sex       | This category assesses whether the sex of participants in the study is the same as that within the NRV publication. | <ul style="list-style-type: none"><li>• If a study contains both men and women, and the NRV equation has either separate equations for men and women, a sex-offset within equation, or equation applicable to both sexes, this would be awarded ‘Yes’ for RoB.</li><li>• If a study contains both men and women, and the NRV equation is based upon only males, this would be awarded ‘Unknown’ for RoB, as this partially matches on the basis of sex – males match, but females do not.</li><li>• If a study NRV does not detail the sex of participants, this would be awarded ‘Unknown’, unless the NRV provides either separate equations for men and women, a sex-offset within equation, or equation applicable to both sexes, in which case a ‘Yes’ would be awarded.</li><li>• If a study contains only females, and the NRV equation is based upon only males, this would be awarded ‘No’ for RoB.</li></ul>                                                                         |
| Age       | This category assesses whether the age of participants in the study is the same as that within the NRV publication. | <ul style="list-style-type: none"><li>• If a study contains both participants aged from 20-40 years of age, and the NRV equation is based upon people from 18-50 years of age, this would be awarded ‘Yes’ for RoB.</li><li>• If a study contains both participants aged from 20-40 years of age, and the NRV equation is based upon people from 30-50 years of age, this would be awarded ‘Unknown’ for RoB, as this partially matches on the basis of age – those 30-40 years match, but those from 20-29 years do not.</li><li>• If either a study or NRV do not detail the age of participants/source population, this would be awarded a ‘Unknown’ status, unless an age component is built into equations that is applicable to all ages, in which case this would be awarded a ‘Yes’ for RoB.</li><li>• If a study contains participants aged 10-18 years of age, and the NRV equation is based upon people aged from 20-50 years of age, this would be awarded ‘No’ for RoB.</li></ul> |
| Modality  | This category assesses whether the modality used in the study is the same as that used in the NRV publication.      | <ul style="list-style-type: none"><li>• If a study utilised cycle ergometry, and the NRV used cycle ergometry, this would be awarded a ‘Yes’ for RoB.</li><li>• If a study utilised cycle ergometry, and the NRV used treadmill exercise, this would be awarded a ‘No’ for RoB.</li><li>• If either a study, or NRV, did not stipulate any modality, this would be awarded a ‘Unknown’ for RoB.</li></ul>                                                                                                                                                                                                                                                                                                                                                                                                                                                                                                                                                                                      |
| ≤5 years  | This category assesses whether the study was published within 5 years or less of the NRV publication.               | <ul style="list-style-type: none"><li>• If a study was published in 2020, and the NRV cited was published in 2013, this would be awarded ‘No’ for RoB.</li><li>• If a study was published in 2020, and the NRV cited was published in 2015, this would be awarded ‘Yes’ for RoB.</li><li>• If no NRV was cited, and therefore no date available, this would be awarded ‘Unknown’ for RoB.</li></ul>                                                                                                                                                                                                                                                                                                                                                                                                                                                                                                                                                                                            |
| ≤10 years | This category assesses whether the study was published within 10 years or less of the NRV publication.              | <ul style="list-style-type: none"><li>• If a study was published in 2020, and the NRV cited was published in 2013, this would be awarded ‘Yes’ for RoB.</li><li>• If a study was published in 2020, and the NRV cited was published in 2010, this would be awarded ‘Yes’ for RoB.</li><li>• If no NRV was cited, and therefore no date available, this would be awarded ‘Unknown’ for RoB.</li></ul>                                                                                                                                                                                                                                                                                                                                                                                                                                                                                                                                                                                           |
| Overall   | This category assigns an ‘overall’ RoB based upon prior categories.                                                 | <ul style="list-style-type: none"><li>• The lowest score achieved from the prior categories is carried forward as the ‘overall’ score, thus identifying the ‘maximum’ bias possible within a study.</li></ul>                                                                                                                                                                                                                                                                                                                                                                                                                                                                                                                                                                                                                                                                                                                                                                                  |

NRV: normal reference value; RoB: risk of bias.
